# Supplementary material for: Comparative Assessment of SSR and RAPD markers for genetic diversity in some Mango cultivars
Source: PeerJ. 2023 Sep 28;11:e15722. doi: 10.7717/peerj.15722 (PMC10542820; doi:10.7717/peerj.15722)
Supplement: Supplemental Information 1 [file peerj-11-15722-s001.xls]

## Sheet: Sheet_1
						Primer MIAC_3
			S.M.	Langra Benares	Mabrouka	Ewais	Taimour	Hindy Besinnara	Mesk	Zebda	S.M.	Hindi mlooky	Companeit Elsowwa	Sukkary white	Mistikawy	Fajri kalan	Elwazza neck	Keitt	S.M.	Kentt	Sennary	Nabiel
	227 bp
	192 bp
						File KZ7_0713
						Primer mMiciR_5
			S.M.	Langra Benares	Mabrouka	Ewais	Taimour	Hindy Besinnara	Mesk	Zebda	S.M.	Hindi mlooky	Companeit Elsowwa	Sukkary white	Mistikawy	Fajri kalan	Elwazza neck	Keitt	S.M.	Kentt	Sennary	Nabiel
	227 bp
	192 bp
	115 bp
						File KZ7_0713
				Primer MiSHRS_18
			S.M.	Langra Benares	Mabrouka	Ewais	Taimour	Hindy Besinnara	Mesk	Zebda	S.M.	Hindi mlooky	Companeit Elsowwa	Sukkary white	Mistikawy	Fajri kalan	Elwazza neck	Keitt	S.M.	Kentt	Sennary	Nabiel
	192 bp
	115 bp
	71 bp
						File KZ8_0713
						Primer LMMA_7
			S.M.	Langra Benares	Mabrouka	Ewais	Taimour	Hindy Besinnara	Mesk	Zebda	S.M.	Hindi mlooky	Companeit Elsowwa	Sukkary white	Mistikawy	Fajri kalan	Elwazza neck	Keitt	S.M.	Kentt	Sennary	Nabiel
	250 bp
	227 bp
	192 bp
					Primer LMMA_1
			S.M.	Langra Benares	Mabrouka	Ewais	Taimour	Hindy Besinnara	Mesk	Zebda	S.M.	Hindi mlooky	Companeit Elsowwa	Sukkary white	Mistikawy	Fajri kalan	Elwazza neck	Keitt	S.M.	Kentt	Sennary	Nabiel
	227 bp
	192 bp
	115 bp
							File KZ7_1018
						Primer LMMA_15
			S.M.	Langra Benares	Mabrouka	Ewais	Taimour	Hindy Besinnara	Mesk	Zebda	S.M.	Hindi mlooky	Companeit Elsowwa	Sukkary white	Mistikawy	Fajri kalan	Elwazza neck	Keitt	S.M.	Kentt	Sennary	Nabiel
	250 bp
	227 bp
	192 bp
						File KZ7_1019
						Primer LMMA_8
			S.M.	Langra Benares	Mabrouka	Ewais	Taimour	Hindy Besinnara	Mesk	Zebda	S.M.	Hindi mlooky	Companeit Elsowwa	Sukkary white	Mistikawy	Fajri kalan	Elwazza neck	Keitt	S.M.	Kentt	Sennary	Nabiel
	300 bp
	250 bp
						File KZ7_0522
						Pimer LMMA_9
			S.M.	Langra Benares	Mabrouka	Ewais	Taimour	Hindy Besinnara	Mesk	Zebda	S.M.	Hindi mlooky	Companeit Elsowwa	Sukkary white	Mistikawy	Fajri kalan	Elwazza neck	Keitt	S.M.	Kentt	Sennary	Nabiel
	227 bp
	192 bp
	115 bp
						File KZ7_1022
						Pimer LMMA_11
			S.M.	Langra Benares	Mabrouka	Ewais	Taimour	Hindy Besinnara	Mesk	Zebda	S.M.	Hindi mlooky	Companeit Elsowwa	Sukkary white	Mistikawy	Fajri kalan	Elwazza neck	Keitt	S.M.	Kentt	Sennary	Nabiel
	300 bp
	250 bp
	227 bp
						File KZ7_0524
						Pimer LMMA_13
			S.M.	Langra Benares	Mabrouka	Ewais	Taimour	Hindy Besinnara	Mesk	Zebda	S.M.	Hindi mlooky	Companeit Elsowwa	Sukkary white	Mistikawy	Fajri kalan	Elwazza neck	Keitt	S.M.	Kentt	Sennary	Nabiel
	227 bp
	192 bp
						File KZ7_0524
						Pimer mMiCIR_8
			S.M.	Langra Benares	Mabrouka	Ewais	Taimour	Hindy Besinnara	Mesk	Zebda	S.M.	Hinidy Elkhassa	Company	White Sukkary	Mistikawy	Fajri kalan	Elwazza neck	Keitt	S.M.	Kentt	Sennary_16	Nabiel_17
	192 bp
	115 bp
						File KZ7_0524
						Primer MiSHRS_4
			S.M.	Langra Benares	Mabrouka	Ewais	Taimour	Hindy Besinnara	Mesk	Zebda	S.M.	Hindi mlooky	Companeit Elsowwa	Sukkary white	Mistikawy	Fajri kalan	Elwazza neck	Keitt	S.M.	Kentt	Sennary	Nabiel
	192 bp
	115 bp
							File KZ8_1030
						Primer MiSHRS_1
			S.M.	Langra Benares	Mabrouka	Ewais	Taimour	Hindy Besinnara	Mesk	Zebda	S.M.	Hindi mlooky	Companeit Elsowwa	Sukkary white	Mistikawy	Fajri kalan	Elwazza neck	Keitt	S.M.	Kentt	Sennary	Nabiel
	227 bp
	192 bp
							File KZ8_0524
						Primer MIAC_4
			S.M.	Banarasi Langra	Mabrouka	Ewais	Taymour	Hindi Besennara	Mesk	Zebda	S.M.	Hindi mlooky	Companeit Elsowwa	Sukkary white	Mstikawy	Fajri kalan	Elwazza neck	Keitt	S.M.	Kent	Sennary	Nabiel
	192 bp
	115 bp
	71 bp
					File KZ8_0525
					Primer MIAC_5
			S.M.	Banarasi Langra	Mabrouka	Ewais	Taymour	Hindi Besennara	Mesk	Zebda	S.M.	Hindi mlooky	Companeit Elsowwa	Sukkary white	Mstikawy	Fajri kalan	Elwazza neck	Keitt	S.M.	Kent	Sennary	Nabiel
	192 bp
	115 bp
						File KZ8_0524
						Primer MiSHRS_32
			S.M.	Langra Benares	Mabrouka	Ewais	Taimour	Hindy Besinnara	Mesk	Zebda	S.M.	Hindi mlooky	Companeit Elsowwa	Sukkary white	Mistikawy	Fajri kalan	Elwazza neck	Keitt	S.M.	Kentt	Sennary	Nabiel
	250 bp
	227 bp
	192 bp
							File KZ7_0530
						Primer mMiCiR_9
			S.M.	Langra Benares	Mabrouka	Ewais	Taimour	Hindy Besinnara	Mesk	Zebda	S.M.	Hindi mlooky	Companeit Elsowwa	Sukkary white	Mistikawy	Fajri kalan	Elwazza neck	Keitt	S.M.	Kentt	Sennary	Nabiel
	192 bp
	115 bp
					File KZ7_0530
					Primer mMiCiR_22
			S.M.	Langra Benares	Mabrouka	Ewais	Taimour	Hindy Besinnara	Mesk	Zebda	S.M.	Hindi mlooky	Companeit Elsowwa	Sukkary white	Mistikawy	Fajri kalan	Elwazza neck	Keitt	S.M.	Kentt	Sennary	Nabiel
	192 bp
	115 bp
						File KZ8_0530
						Primer MIAC_2
			S.M.	Langra Benares	Mabrouka	Ewais	Taimour	Hindy Besinnara	Mesk	Zebda	S.M.	Hindi mlooky	Companeit Elsowwa	Sukkary white	Mistikawy	Fajri kalan	Elwazza neck	Keitt	S.M.	Kentt	Sennary	Nabiel
	192 bp
	115 bp
						File KZ7_1021
						Primer MiSHRS_29
			S.M.	Langra Benares	Mabrouka	Ewais	Taimour	Hindy Besinnara	Mesk	Zebda	S.M.	Hindi mlooky	Companeit Elsowwa	Sukkary white	Mistikawy	Fajri kalan	Elwazza neck	Keitt	S.M.	Kentt	Sennary	Nabiel
	227 bp
	192 bp
	115 bp
							File KZ7_1021
						Primer LMMA_14
			S.M.	Langra Benares	Mabrouka	Ewais	Taimour	Hindy Besinnara	Mesk	Zebda	S.M.	Hindi mlooky	Companeit Elsowwa	Sukkary white	Mistikawy	Fajri kalan	Elwazza neck	Keitt	S.M.	Kentt	Sennary	Nabiel
	192 bp
	115 bp
						File KZ8_1021
						Primer LMMA_10
			S.M.	Langra Benares	Mabrouka	Ewais	Taimour	Hindy Besinnara	Mesk	Zebda	S.M.	Hindi mlooky	Companeit Elsowwa	Sukkary white	Mistikawy	Fajri kalan	Elwazza neck	Keitt	S.M.	Kentt	Sennary	Nabiel
	227 bp
	192 bp
	115 bp
						File KZ8_0628
						Primer mMiCiR_18
			S.M.	Langra Benares	Mabrouka	Ewais	Taimour	Hindy Besinnara	Mesk	Zebda	S.M.	Hindi mlooky	Companeit Elsowwa	Sukkary white	Mistikawy	Fajri kalan	Elwazza neck	Keitt	S.M.	Kentt	Sennary	Nabiel
	250 bp
	227 bp
	192 bp
					File KZ7_0629
					Primer mMiCiR_25
			S.M.	Langra Benares	Mabrouka	Ewais	Taimour	Hindy Besinnara	Mesk	Zebda	S.M.	Hindi mlooky	Companeit Elsowwa	Sukkary white	Mistikawy	Fajri kalan	Elwazza neck	Keitt	S.M.	Kentt	Sennary	Nabiel
	300 bp
	250 bp
	227 bp
	192 bp
					File KZ7_1018
					Primer MiSHRS_48
			S.M.	Langra Benares	Mabrouka	Ewais	Taimour	Hindy Besinnara	Mesk	Zebda	S.M.	Hindi mlooky	Companeit Elsowwa	Sukkary white	Mistikawy	Fajri kalan	Elwazza neck	Keitt	S.M.	Kentt	Sennary	Nabiel
	250 bp
	227 bp
	192 bp
					File KZ7_1022
					Primer mMiCiR_21
			S.M.	Langra Benares	Mabrouka	Ewais	Taimour	Hindy Besinnara	Mesk	Zebda	S.M.	Hindi mlooky	Companeit Elsowwa	Sukkary white	Mistikawy	Fajri kalan	Elwazza neck	Keitt	S.M.	Kentt	Sennary	Nabiel
	227 bp
	192 bp
	115 bp
							File KZ7_0710
							Primer MIAC_6
			S.M.	Langra Benares	Mabrouka	Ewais	Taimour	Hindy Besinnara	Mesk	Zebda	S.M.	Hindi mlooky	Companeit Elsowwa	Sukkary white	Mistikawy	Fajri kalan	Elwazza neck	Keitt	S.M.	Kentt	Sennary	Nabiel
	350 bp
	325 bp
	300 bp
	250 bp
						File KZ7_1022
						Primer mMiCIR_36
			S.M.	Langra Benares	Mabrouka	Ewais	Taimour	Hindy Besinnara	Mesk	Zebda	S.M.	Hindi mlooky	Companeit Elsowwa	Sukkary white	Mistikawy	Fajri kalan	Elwazza neck	Keitt	S.M.	Kentt	Sennary	Nabiel
	300 bp
	250 bp
					File KZ8_1109
					Primer mMiCIR_29
			S.M.	Langra Benares	Mabrouka	Ewais	Taimour	Hindy Besinnara	Mesk	Zebda	S.M.	Hindi mlooky	Companeit Elsowwa	Sukkary white	Mistikawy	Fajri kalan	Elwazza neck	Keitt	S.M.	Kentt	Sennary	Nabiel
	227 bp
	192 bp
	115 bp
								File KZ8_1022
						Primer mMiCIR_30
			S.M.	Langra Benares	Mabrouka	Ewais	Taimour	Hindy Besinnara	Mesk	Zebda	S.M.	Hindi mlooky	Companeit Elsowwa	Sukkary white	Mistikawy	Fajri kalan	Elwazza neck	Keitt	S.M.	Kentt	Sennary	Nabiel
	227 bp
	192 bp
							File KZ8_1021
