# Supplementary material for: Comparative Assessment of SSR and RAPD markers for genetic diversity in some Mango cultivars
Source: PeerJ. 2023 Sep 28;11:e15722. doi: 10.7717/peerj.15722 (PMC10542820; doi:10.7717/peerj.15722)
Supplement: Supplemental Information 2 [file peerj-11-15722-s002.xls]

## Sheet: Sheet1
											Primer OPM_20
M.W. by base pair	S.M.	Langra Benares	Mabrouka	Ewais	Taimour	Hindi Besannara	Mesk	Zebda	Hindi mlooky	Companeit Elsowwa	Sukkary white	Mestkawy	Fajri kalan	Elwazza neck	Keitt	Kentt	Senarry	Nabiel
1118
881
692
501
489
404
331
242
190
													Primer OPQ_05
M.W. bp	S.M.	Langra Benares	Mabrouka	Ewais	Taimour	Hindi Besannara	Mesk	Zebda	Hindi mlooky	Companeit Elsowwa	Sukkary white	Mestkawy	Fajri kalan	Elwazza neck	Keitt	Kentt	Senarry	Nabiel
1118
881
692
501
489
404
331
242
													primer OPS_17
M.W. by base pair	S.M.	Langra Benares	Mabrouka	Ewais	Taimour	Hindi Besannara	Mesk	Zebda	Hindi mlooky	Companeit Elsowwa	Sukkary white	Mestkawy	Fajri kalan	Elwazza neck	Keitt	Kentt	Senarry	Nabiel
1118
881
692
501
489
404
331
242
190
													Primer OPX_02
M.W. by base pair	S.M.	Langra Benares	Mabrouka	Ewais	Taimour	Hindi Besannara	Mesk	Zebda	Hindi mlooky	Companeit Elsowwa	Sukkary white	Mestkawy	Fajri kalan	Elwazza neck	Keitt	Kentt	Senarry	Nabiel
1118
881
692
501
489
404
331
													Primer OPX_08
M.W. by base pair	S.M.	Langra Benares	Mabrouka	Ewais	Taimour	Hindi Besannara	Mesk	Zebda	Hindi mlooky	Companeit Elsowwa	Sukkary white	Mestkawy	Fajri kalan	Elwazza neck	Keitt	Kentt	Senarry	Nabiel
1118
881
692
501
489
404
331
242
													Primer OPH_18
M.W. by base pair	S.M.	Langra Benares	Mabrouka	Ewais	Taimour	Hindi Besannara	Mesk	Zebda	Hindi mlooky	Companeit Elsowwa	Sukkary white	Mestkawy	Fajri kalan	Elwazza neck	Keitt	Kentt	Senarry	Nabiel
1118
881
692
501
489
404
331
242
													Primer OPA_18
M.W. by base pair	S.M.	Langra Benares	Mabrouka	Ewais	Taimour	Hindi Besannara	Mesk	Zebda	Hindi mlooky	Companeit Elsowwa	Sukkary white	Mestkawy	Fajri kalan	Elwazza neck	Keitt	Kentt	Senarry	Nabiel
1118
881
692
501
489
404
331
242
													Primer OPD_20
M.W. by base pair	S.M.	Langra Benares	Mabrouka	Ewais	Taimour	Hindi Besannara	Mesk	Zebda	Hindi mlooky	Companeit Elsowwa	Sukkary white	Mestkawy	Fajri kalan	Elwazza neck	Keitt	Kentt	Senarry	Nabiel
1118
881
692
501
489
404
331
242
													Primer OPA_01
M.W. by base pair	S.M.	Langra Benares	Mabrouka	Ewais	Taimour	Hindi Besannara	Mesk	Zebda	Hindi mlooky	Companeit Elsowwa	Sukkary white	Mestkawy	Fajri kalan	Elwazza neck	Keitt	Kentt	Senarry	Nabiel
1118
881
692
501
489
404
													Primer OPA_04
M.W. by base pair	S.M.	Langra Benares	Mabrouka	Ewais	Taimour	Hindi Besannara	Mesk	Zebda	Hindi mlooky	Companeit Elsowwa	Sukkary white	Mestkawy	Fajri kalan	Elwazza neck	Keitt	Kentt	Senarry	Nabiel
1118
881
692
501
489
404
331
242
													Primer OPA_07
M.W. by base pair	S.M.	Langra Benares	Mabrouka	Ewais	Taimour	Hindi Besannara	Mesk	Zebda	Hindi mlooky	Companeit Elsowwa	Sukkary white	Mestkawy	Fajri kalan	Elwazza neck	Keitt	Kentt	Senarry	Nabiel
1118
881
692
501
489
404
331
242
													Primer OPA_09
M.W. by base pair	S.M.	Langra Benares	Mabrouka	Ewais	Taimour	Hindi Besannara	Mesk	Zebda	Hindi mlooky	Companeit Elsowwa	Sukkary white	Mestkawy	Fajri kalan	Elwazza neck	Keitt	Kentt	Senarry	Nabiel
881
692
501
489
404
331
													Primer OPA_11
M.W. by base pair	S.M.	Langra Benares	Mabrouka	Ewais	Taimour	Hindi Besannara	Mesk	Zebda	Hindi mlooky	Companeit Elsowwa	Sukkary white	Mestkawy	Fajri kalan	Elwazza neck	Keitt	Kentt	Senarry	Nabiel
1118
881
692
501
489
404
331
242
													Primer OPA_13
M.W. by base pair	S.M.	Langra Benares	Mabrouka	Ewais	Taimour	Hindi Besannara	Mesk	Zebda	Hindi mlooky	Companeit Elsowwa	Sukkary white	Mestkawy	Fajri kalan	Elwazza neck	Keitt	Kentt	Senarry	Nabiel
692
501
489
404
331
242
													Primer OPB_11
M.W. by base pair	S.M.	Langra Benares	Mabrouka	Ewais	Taimour	Hindi Besannara	Mesk	Zebda	Hindi mlooky	Companeit Elsowwa	Sukkary white	Mestkawy	Fajri kalan	Elwazza neck	Keitt	Kentt	Senarry	Nabiel
1118
881
692
501
													Primer OPB_17
M.W. by base pair	S.M.	Langra Benares	Mabrouka	Ewais	Taimour	Hindi Besannara	Mesk	Zebda	Hindi mlooky	Companeit Elsowwa	Sukkary white	Mestkawy	Fajri kalan	Elwazza neck	Keitt	Kentt	Senarry	Nabiel
1118
881
692
501
489
404
331
242
													Primer OPC_05
M.W. by base pair	S.M.	Langra Benares	Mabrouka	Ewais	Taimour	Hindi Besannara	Mesk	Zebda	Hindi mlooky	Companeit Elsowwa	Sukkary white	Mestkawy	Fajri kalan	Elwazza neck	Keitt	Kentt	Senarry	Nabiel	18	19	20	21	22	23	24	25	26	27
1118
881
692
501
489
404
331
													Primer OPD_13
M.W. by base pair	S.M.	Langra Benares	Mabrouka	Ewais	Taimour	Hindi Besannara	Mesk	Zebda	Hindi mlooky	Companeit Elsowwa	Sukkary white	Mestkawy	Fajri kalan	Elwazza neck	Keitt	Kentt	Senarry	Nabiel
1118
881
692
501
489
404
331
242
190
													Primer OPE_12
M.W. by base pair	S.M.	Langra Benares	Mabrouka	Ewais	Taimour	Hindi Besannara	Mesk	Zebda	Hindi mlooky	Companeit Elsowwa	Sukkary white	Mestkawy	Fajri kalan	Elwazza neck	Keitt	Kentt	Senarry	Nabiel
1118
881
692
501
489
404
331
													Primer OPG_11
M.W. by base pair	S.M.	Langra Benares	Mabrouka	Ewais	Taimour	Hindi Besannara	Mesk	Zebda	Hindi mlooky	Companeit Elsowwa	Sukkary white	Mestkawy	Fajri kalan	Elwazza neck	Keitt	Kentt	Senarry	Nabiel
1118
881
692
501
489
404
331
													Primer OPJ_20
M.W. by base pair	S.M.	Langra Benares	Mabrouka	Ewais	Taimour	Hindi Besannara	Mesk	Zebda	Hindi mlooky	Companeit Elsowwa	Sukkary white	Mestkawy	Fajri kalan	Elwazza neck	Keitt	Kentt	Senarry	Nabiel
881
692
501
489
404
331
													Primer OPK_10
M.W. bp	S.M.	Langra Benares	Mabrouka	Ewais	Taimour	Hindi Besannara	Mesk	Zebda	Hindi mlooky	Companeit Elsowwa	Sukkary white	Mestkawy	Fajri kalan	Elwazza neck	Keitt	Kentt	Senarry	Nabiel
1118
881
692
501
489
404
331
													Primer OPM_06
										Nabiel	Sennary	Kentt	Keitt	Elwazza neck	Fajri kalan	Mestkawy	Sukkary white	Companeit Elsowwa	Hindi mlooky	Zebda	Mesk	Hindi Besannara	Taimour	Ewais	Mabrouka	Langra Benares	S.M.	M.W. by base pair
																												1118
																												881
																												692
																												501
																												489
																												404
																												331
																												242
																												190
													Primer OPM_12
										Nabiel	Sennary	Kentt	Keitt	Elwazza neck	Fajri kalan	Mestkawy	Sukkary white	Companeit Elsowwa	Hindi mlooky	Zebda	Mesk	Hindi Besannara	Taimour	Ewais	Mabrouka	Langra Benares	S.M.	M.W. by base pair
																												404
																												331
																												242
																												190
																												147
													Primer OPM_15
										Nabiel	Sennary	Kentt	Keitt	Elwazza neck	Fajri kalan	Mestkawy	Sukkary white	Companeit Elsowwa	Hindi mlooky	Zebda	Mesk	Hindi Besannara	Taimour	Ewais	Mabrouka	Langra Benares	S.M.	M.W. by base pair
																												1118
																												881
																												692
																												501
																												489
																												404
																												331
																												242
													Primer OPO_12
M.W. by base pair	S.M.	Langra Benares	Mabrouka	Ewais	Taimour	Hindi Besannara	Mesk	Zebda	Hindi mlooky	Companeit Elsowwa	Sukkary white	Mestkawy	Fajri kalan	Elwazza neck	Keitt	Kentt	Senarry	Nabiel
1118
881
692
501
489
404
331
242
													Primer OPW_11
M.W. by base pair	S.M.	Langra Benares	Mabrouka	Ewais	Taimour	Hindi Besannara	Mesk	Zebda	Hindi mlooky	Companeit Elsowwa	Sukkary white	Mestkawy	Fajri kalan	Elwazza neck	Keitt	Kentt	Senarry	Nabiel
1118
881
692
501
489
404
331
242
190
						Primer OPX_01
M.W. by base pair	S.M.	Langra Benares	Mabrouka	Ewais	Taimour	Hindi Besannara	Mesk	Zebda	Hindi mlooky	Companeit Elsowwa	Sukkary white	Mestkawy	Fajri kalan	Elwazza neck	Keitt	Kentt	Senarry	Nabiel
1118
881
692
501
48
404
331
													Primer OPX_17
M.W. by base pair	S.M.	Langra Benares	Mabrouka	Ewais	Taimour	Hindi Besannara	Mesk	Zebda	Hindi mlooky	Companeit Elsowwa	Sukkary white	Mestkawy	Fajri kalan	Elwazza neck	Keitt	Kentt	Senarry	Nabiel
881
692
501
489
404
331
242
190
													Primer OPX_18
M.W. by base pair	S.M.	Langra Benares	Mabrouka	Ewais	Taimour	Hindi Besannara	Mesk	Zebda	Hindi mlooky	Companeit Elsowwa	Sukkary white	Mestkawy	Fajri kalan	Elwazza neck	Keitt	Kentt	Senarry	Nabiel
1118
881
692
501
489
404
331
242
190
