# Supplementary material for: Comparative Assessment of SSR and RAPD markers for genetic diversity in some Mango cultivars
Source: PeerJ. 2023 Sep 28;11:e15722. doi: 10.7717/peerj.15722 (PMC10542820; doi:10.7717/peerj.15722)
Supplement: Supplemental Information 3 [file peerj-11-15722-s003.xlsx]

## Sheet: Sheet_1
Primer name (Locus)	Number of bands		Molecular weight (bp)		Banarasi Langra	Mabrouka	Ewais	Taymour	Hindi Besennara	Mesk	Zebda	Hindi mlooky	Companeit Elsowwa	Sukkary white	Mistikawy	Fajri kalan	Elwazza neck	Keitt	Kent	Sennary	Nabiel	Mono	Specific Markers	Nomber of band	Frequancies	Squared Ferquancies	Total bands	No. of polymorphic
Primer OPM_20	21	1	1157	M20_1157	1	1	1	1	0	0	0	1	1	1	1	0	1	1	0	0	1			11	0.0528846	0.00279678
		1	857	M20_857	0	1	1	1	0	0	0	0	0	0	0	0	0	0	0	1	0			4	0.0192308	0.000369822
		1	834	M20_834	0	0	0	0	0	0	0	0	1	0	0	0	0	0	1	0	1			3	0.0144231	0.000208025
		1	804	M20_804	0	0	0	0	1	1	0	1	0	0	1	0	0	0	0	1	0			5	0.0240385	0.000577848
		1	757	M20_757	1	1	1	1	1	1	1	1	1	1	1	1	1	1	1	1	1	1		18	0.0865385	0.00748891
		1	733	M20_733	1	1	1	1	1	1	1	1	1	1	1	1	1	1	1	1	1	1		18	0.0865385	0.00748891
		1	620	M20_620	0	1	1	1	1	1	1	0	1	1	1	1	1	1	1	1	0			14	0.0673077	0.00453033
		1	548	M20_548	1	1	1	1	1	1	1	1	1	1	1	1	1	1	1	1	1	1		18	0.0865385	0.00748891
		1	512	M20_512	0	0	0	0	0	0	0	0	0	0	0	0	1	0	0	0	0			1	0.00480769	2.31139e-05
		1	496	M20_496	0	1	1	0	0	1	1	0	0	0	0	0	1	0	1	1	0			7	0.0336538	0.00113258
15		1	490	M20_490	1	1	1	1	1	1	1	1	1	1	1	1	1	1	1	1	1	1		18	0.0865385	0.00748891
		1	476	M20_476	0	0	1	1	1	0	1	1	0	0	0	1	0	1	0	0	0			7	0.0336538	0.00113258	21	15
		1	440	M20_440	0	0	0	0	0	1	0	0	0	0	1	0	1	0	0	1	1			5	0.0240385	0.000577848
		1	433	M20_433	0	0	0	0	0	0	1	0	0	0	0	0	1	1	1	1	0			5	0.0240385	0.000577848
		1	423	M20_423	1	1	1	1	1	1	0	1	1	1	1	0	1	0	0	0	1			12	0.0576923	0.0033284
		1	411	M20_411	0	0	0	0	0	0	0	0	0	0	0	1	0	0	0	0	0		M20_411	1	0.00480769	2.31139e-05
		1	398	M20_398	1	1	1	1	1	1	1	1	1	1	1	1	1	1	1	1	1	1		18	0.0865385	0.00748891
		1	371	M20_371	0	0	0	0	0	1	0	0	0	0	0	0	0	0	0	0	0		M20_371	1	0.00480769	2.31139e-05
		1	359	M20_359	0	1	1	1	1	1	1	1	0	1	1	1	1	1	1	1	1			15	0.0721154	0.00520063
		1	368	M20_368	0	1	0	1	1	0	0	1	0	0	1	0	1	1	0	1	1			9	0.0432692	0.00187223
		1	353	M20_353	1	1	1	1	1	1	1	1	1	1	1	1	1	1	1	1	1	1		18	0.0865385	0.00748891
																								208	1	0.0673077
Primer OPQ_05	24	1	1655	Q05_1655	1	1	0	1	1	0	0	1	1	1	0	1	1	1	0	1	0			11	0.0491071	0.00241151
		1	1422	Q05_1422	1	1	0	1	1	0	1	0	0	1	0	0	1	1	1	1	0			10	0.0446429	0.00199298
		1	1332	Q05_1332	1	1	1	0	0	1	0	1	1	0	1	1	0	0	0	0	1			9	0.0401786	0.00161432
		1	1287	Q05_1287	0	0	0	1	0	0	1	0	0	1	0	0	0	1	0	1	0			5	0.0223214	0.000498246
		1	1227	Q05_1227	0	0	0	0	1	0	0	0	0	0	0	0	0	1	0	0	0			2	0.00892857	7.97194e-05
		1	1168	Q05_1168	1	1	1	1	1	0	1	1	1	1	1	1	1	0	0	1	1			14	0.0625	0.00390625
		1	1170	Q05_1170	1	0	0	1	1	1	1	1	0	1	0	1	1	0	1	1	1			12	0.0535714	0.0028699
		1	837	Q05_837	1	0	0	0	0	0	1	0	0	0	0	0	1	1	0	1	1			6	0.0267857	0.000717474	24	22
		1	763	Q05_763	0	1	1	1	0	0	0	0	1	0	0	1	1	1	0	0	1			8	0.0357143	0.00127551
		1	754	Q05_754	1	1	1	1	1	1	1	1	1	1	0	0	0	0	0	0	0			10	0.0446429	0.00199298
		1	718	Q05_718	1	1	1	1	1	1	1	1	1	1	1	1	1	1	1	1	1	1		18	0.0803571	0.00645727
		1	529	Q05_529	1	1	1	1	0	1	1	0	1	1	1	1	1	1	1	0	1			14	0.0625	0.00390625
		1	499	Q05_499	0	0	0	0	1	0	0	0	0	0	1	1	0	1	0	0	0			4	0.0178571	0.000318878
		1	496	Q05_496	0	1	1	1	1	1	1	1	1	1	1	0	1	1	1	0	1			14	0.0625	0.00390625
		1	489	Q05_489	0	1	1	1	1	1	1	1	0	1	1	1	0	0	1	1	1			13	0.0580357	0.00336814
		1	477	Q05_477	1	0	0	0	1	0	0	1	0	0	0	0	0	0	1	0	1			5	0.0223214	0.000498246
		1	450	Q05_450	1	1	1	1	1	1	1	1	1	1	1	1	1	1	1	1	1	1		18	0.0803571	0.00645727
		1	429	Q05_429	0	0	1	0	0	0	0	0	1	0	0	0	0	0	0	0	0			2	0.00892857	7.97194e-05
		1	415	Q05_415	0	0	0	0	0	0	0	0	0	0	0	0	0	1	1	0	1			3	0.0133929	0.000179369
		1	388	Q05_388	1	0	1	1	1	1	1	1	1	1	1	1	1	1	0	1	1			15	0.0669643	0.00448422
		1	360	Q05_360	0	0	0	0	1	0	0	0	0	0	0	0	0	0	0	0	0		Q05_360	1	0.00446429	1.99298e-05
		1	347	Q05_347	1	1	0	1	0	1	1	1	1	0	0	1	0	1	1	1	0			11	0.0491071	0.00241151
		1	344	Q05_344	1	1	1	1	1	1	1	1	0	1	1	1	1	0	0	1	1			14	0.0625	0.00390625
		1	312	Q05_312	0	1	0	0	0	1	0	0	0	1	0	0	0	0	1	0	1			5	0.0223214	0.000498246
																								224	1	0.0538504
Primer OPS_17	19	1	1374	S17_1374	1	1	1	1	1	1	1	1	1	1	1	1	1	1	1	1	1	1		18	0.101695	0.0103419
		1	1010	S17_1010	0	0	1	1	0	0	0	0	0	0	0	0	0	0	0	1	0			3	0.0169492	0.000287274
		1	858	S17_858	1	0	0	0	1	0	1	0	0	1	0	1	0	1	0	1	1			8	0.0451977	0.00204284
		1	752	S17_752	1	0	0	0	0	0	0	0	0	0	0	0	0	0	0	0	0		S17_752	1	0.00564972	3.19193e-05
		1	694	S17_694	0	0	0	0	0	0	0	0	1	0	1	1	0	1	0	0	1			5	0.0282486	0.000797983	19	15
		1	550	S17_550	1	0	0	1	0	0	1	0	0	1	1	1	1	1	1	0	1			10	0.0564972	0.00319193
		1	496	S17_496	0	0	0	0	0	0	1	0	0	0	1	0	0	0	0	0	0			2	0.0112994	0.000127677
		1	490	S17_490	1	1	0	1	1	1	0	0	1	1	1	0	1	1	1	1	1			13	0.0734463	0.00539436
		1	480	S17_480	1	1	0	1	1	1	1	1	1	1	1	1	1	1	1	1	1			16	0.0903955	0.00817134
		1	446	S17_446	1	1	1	1	1	1	1	1	1	1	1	1	1	1	1	1	1	1		18	0.101695	0.0103419
		1	436	S17_436	0	1	0	0	0	0	0	0	0	1	1	0	0	0	0	0	0			3	0.0169492	0.000287274
		1	415	S17_415	1	1	1	1	1	1	1	1	1	1	1	1	1	1	1	1	1	1		18	0.101695	0.0103419
		1	387	S17_387	1	0	1	1	1	1	1	1	1	1	1	1	0	1	0	1	1			14	0.079096	0.00625618
		1	378	S17_378	0	1	0	0	1	0	0	1	0	0	1	0	0	0	0	0	0			4	0.0225989	0.000510709
		1	366	S17_366	0	0	0	0	0	0	0	1	0	1	1	0	0	1	0	1	1			6	0.0338983	0.0011491
		1	307	S17_307	1	1	1	0	0	1	1	1	1	1	1	1	0	1	1	1	1			14	0.079096	0.00625618
		1	282	S17_282	0	0	0	1	1	0	0	0	0	0	1	0	0	0	0	0	0			3	0.0169492	0.000287274
		1	276	S17_276	1	1	1	1	1	1	1	1	1	1	1	1	1	1	1	1	1	1		18	0.101695	0.0103419
		1	194	S17_194	0	1	1	0	0	0	0	0	0	0	0	0	0	0	0	0	1			3	0.0169492	0.000287274
																								177	1
Primer OPD_20	19	1	942	D20_942	0	0	0	0	0	0	1	0	0	1	0	0	0	0	0	0	0			2	0.0102564	0.000105194
		1	858	D20_858	1	1	1	1	1	1	1	1	1	1	1	1	1	1	1	1	1	1		18	0.0923077	0.00852071
		1	833	D20_833	1	1	1	0	1	1	0	0	1	0	1	1	0	1	1	1	1			12	0.0615385	0.00378698
		1	785	D20_785	1	1	1	1	1	1	1	1	1	1	1	1	1	1	1	1	1	1		18	0.0923077	0.00852071
		1	768	D20_768	1	1	0	1	0	0	0	0	0	0	0	1	1	1	0	1	1			8	0.0410256	0.0016831
		1	745	D20_745	0	1	0	1	0	0	0	0	0	0	0	1	0	1	1	0	1			6	0.0307692	0.000946746
		1	723	D20_723	1	1	1	1	1	1	1	1	1	1	1	1	1	1	1	1	1	1		18	0.0923077	0.00852071
		1	701	D20_701	1	1	1	1	1	1	1	1	1	1	1	1	1	1	1	1	1	1		18	0.0923077	0.00852071
		1	649	D20_649	0	0	0	0	0	0	1	0	0	0	0	1	0	0	0	0	0			2	0.0102564	0.000105194	19	13
		1	596	D20_596	0	0	0	0	0	0	0	0	0	0	1	0	0	0	0	0	0			1	0.00512821	2.62985e-05
		1	490	D20_490	1	1	1	1	1	1	1	1	1	1	1	1	1	1	1	1	1	1		18	0.0923077	0.00852071
		1	489	D20_489	0	0	0	0	0	0	0	0	0	0	0	0	0	0	1	0	0		D20_489	1	0.00512821	2.62985e-05
		1	469	D20_469	1	1	1	1	1	1	1	1	1	1	1	1	1	1	1	1	1	1		18	0.0923077	0.00852071
		1	455	D20_455	0	0	0	0	0	0	1	0	0	0	0	0	0	0	1	0	0			2	0.0102564	0.000105194
		1	398	D20_398	1	1	1	1	1	0	0	1	1	1	0	1	1	0	1	1	1			13	0.0666667	0.00444444
		1	396	D20_396	0	1	0	1	1	1	0	1	1	0	1	1	1	1	1	1	1			13	0.0666667	0.00444444
		1	347	D20_347	0	0	0	0	0	0	0	0	0	0	0	0	0	0	1	0	0			1	0.00512821	2.62985e-05
		1	335	D20_335	1	1	0	1	1	1	1	1	1	0	1	1	1	1	1	1	1			15	0.0769231	0.00591716
		1	331	D20_331	1	1	0	1	0	1	1	1	0	0	1	0	1	0	1	1	1			11	0.0564103	0.00318212
																								195	1
Primer OPO_12	6	1	1243	O12_1243	1	1	1	1	1	1	1	1	1	1	1	1	1	1	1	1	1	1		18	0.321429	0.103316
		1	968	O12_968	1	1	1	1	0	0	0	0	1	0	0	0	0	0	0	1	1			7	0.125	0.015625
		1	783	O12_783	1	1	1	1	0	0	0	0	1	0	0	0	0	0	0	0	1			6	0.107143	0.0114796	6	5
		1	703	O12_703	1	1	0	1	1	1	0	1	1	1	1	1	1	0	1	0	0			12	0.214286	0.0459184
		1	727	O12_727	0	0	1	1	0	0	1	0	0	1	0	0	0	1	0	1	1			7	0.125	0.015625
		1	347	O12_347	1	1	1	1	0	0	0	0	1	0	0	0	0	0	0	0	1			6	0.107143	0.0114796
																								56	1
Primer OPA_13	11	1	569	A13_569	1	1	1	1	1	1	1	1	1	1	1	1	1	1	1	1	1	1		18	0.153846	0.0236686
		1	498	A13_498	0	0	0	0	0	1	1	1	1	1	1	1	0	1	1	1	0			10	0.0854701	0.00730514
		1	494	A13_494	1	1	1	0	0	0	1	0	1	0	1	1	0	0	0	0	0			7	0.0598291	0.00357952
		1	437	A13_437	1	1	1	1	1	1	1	1	1	1	1	1	1	1	1	1	1	1		18	0.153846	0.0236686
		1	392	A13_392	1	1	1	1	1	1	1	1	1	1	1	1	1	1	1	1	1	1		18	0.153846	0.0236686
		1	381	A13_381	1	0	0	1	0	0	0	0	0	0	0	1	0	0	0	0	0			3	0.025641	0.000657462	11	7
		1	344	A13_344	1	1	1	1	1	1	1	1	1	1	1	1	1	1	1	0	1			16	0.136752	0.0187011
		1	326	A13_326	0	0	0	0	1	0	0	0	1	0	0	1	0	0	0	0	0			3	0.025641	0.000657462
		1	324	A13_324	1	1	1	1	1	1	1	1	1	1	1	1	1	1	1	1	1	1		18	0.153846	0.0236686
		1	320	A13_320	0	0	0	0	0	0	0	0	0	0	0	1	0	0	0	0	0		A13_320	1	0.00854701	7.30514e-05
		1	234	A13_234	0	0	0	0	0	0	1	0	0	0	1	0	1	0	0	1	1			5	0.042735	0.00182628
																								117	1
Primer OPB_11	10	1	1490	B11_1490	1	1	1	1	1	1	1	1	1	1	1	0	1	0	0	0	0			12	0.155844	0.0242874
		1	1412	B11_1412	0	0	0	0	0	0	0	0	0	0	1	0	0	0	0	0	0		B11_1412	1	0.012987	0.000168663
		1	1330	B11_1330	0	0	0	0	0	0	0	0	0	0	0	0	0	0	0	1	0			1	0.012987	0.000168663
		1	1165	B11_1165	1	1	1	1	1	1	1	1	1	1	1	1	1	0	1	1	1		B11_1165	16	0.207792	0.0431776
		1	909	B11_909	1	1	1	1	1	1	0	1	1	1	1	0	0	0	0	1	0			11	0.142857	0.0204082	10	10
		1	843	B11_843	0	0	0	0	1	0	0	1	0	0	0	0	0	0	0	0	0			2	0.025974	0.00067465
		1	810	B11_810	1	0	0	1	1	0	1	1	0	1	1	0	1	0	0	0	1			9	0.116883	0.0136617
		1	785	B11_785	1	1	1	1	1	1	1	0	0	1	1	0	1	1	1	1	1			14	0.181818	0.0330579
		1	711	B11_711	1	1	0	0	1	1	0	0	1	0	1	1	0	1	1	0	0			9	0.116883	0.0136617
		1	534	B11_534	1	0	0	0	0	1	0	0	0	0	0	0	0	0	0	0	0			2	0.025974	0.00067465
																								77	1
Primer OPJ_20	14	1	858	J20_858	1	1	1	1	1	1	1	1	1	1	0	1	1	1	0	0	1			14	0.103704	0.0107545
		1	777	J20_777	0	0	0	0	0	0	0	0	0	0	1	0	0	1	1	1	0			4	0.0296296	0.000877915
		1	623	J20_623	0	0	1	0	0	0	0	0	1	0	1	1	0	1	1	0	1			7	0.0518519	0.00268861
		1	499	J20_499	1	1	1	1	1	1	1	1	1	1	1	1	1	1	1	1	1	1		18	0.133333	0.0177778
		1	495	J20_495	1	0	1	0	1	0	1	1	0	0	1	0	0	0	1	1	1			9	0.0666667	0.00444444
		1	493	J20_493	1	1	0	1	1	0	1	0	0	0	1	0	0	0	0	1	0			7	0.0518519	0.00268861	14	12
		1	475	J20_475	0	0	1	0	0	0	1	0	0	0	1	0	0	0	1	1	0			5	0.037037	0.00137174
		1	460	J20_460	0	1	0	1	1	1	1	1	1	1	1	0	1	1	1	1	0			13	0.0962963	0.00927298
		1	430	J20_430	0	1	1	0	0	0	0	0	1	0	0	1	0	0	0	0	0			4	0.0296296	0.000877915
		1	420	J20_420	1	1	1	1	1	1	1	1	1	1	1	1	1	1	1	1	1	1		18	0.133333	0.0177778
		1	395	J20_395	1	0	1	1	1	1	1	0	1	1	1	1	1	1	1	1	1			15	0.111111	0.0123457
		1	393	J20_393	0	1	1	0	0	0	0	0	0	0	1	0	0	0	0	0	1			4	0.0296296	0.000877915
		1	377	J20_377	0	0	0	0	0	0	0	0	0	0	1	1	0	0	0	0	1			3	0.0222222	0.000493827
		1	355	J20_355	1	1	1	1	0	1	1	1	1	1	1	0	1	0	1	1	1			14	0.103704	0.0107545
																								135	1
Primer OPA_09	13	1	885	A09_885	0	0	0	0	1	0	0	0	1	0	1	0	0	1	1	0	1			6	0.06	0.0036
		1	817	A09_817	0	0	1	0	1	0	0	0	0	0	1	0	0	0	0	0	1			4	0.04	0.0016
		1	794	A09_794	0	0	0	1	1	0	1	0	1	1	1	0	1	1	0	1	1			10	0.1	0.01
		1	784	A09_784	0	0	1	0	0	0	1	1	1	1	1	1	0	1	1	1	1			11	0.11	0.0121
		1	767	A09_767	1	1	1	1	1	1	0	0	0	0	0	0	0	0	0	0	0			6	0.06	0.0036	13	12
		1	720	A09_720	1	0	0	0	1	0	1	0	1	0	1	0	1	0	0	1	1			8	0.08	0.0064
		1	644	A09_644	0	1	0	1	1	1	0	0	0	0	1	0	1	1	1	1	1			10	0.1	0.01
		1	560	A09_560	1	1	1	1	1	1	0	1	1	1	1	1	1	1	1	1	1			16	0.16	0.0256
		1	514	A09_414	0	0	1	0	0	0	0	0	1	0	0	0	0	0	0	0	0			2	0.02	0.0004
		1	494	A09_494	1	1	1	1	1	1	1	1	1	1	1	1	1	1	1	1	1	1		18	0.18	0.0324
		1	482	A09_482	0	0	0	0	1	0	0	0	0	0	0	1	0	1	0	0	0			3	0.03	0.0009
		1	397	A09_397	0	0	0	0	0	0	0	1	0	1	0	0	0	0	0	1	0			3	0.03	0.0009
		1	366	A09_366	0	0	0	0	1	0	0	0	0	1	0	0	0	0	1	0	0			3	0.03	0.0009
																								100	1
Primer OPX_18	14	1	1250	X18_1250	1	1	1	1	1	1	1	1	1	1	0	1	1	1	1	1	1		X18_1250	16	0.115942	0.0134426
		1	986	X18_986	1	1	0	1	1	1	1	0	1	1	1	1	1	1	1	1	1			15	0.108696	0.0118147
		1	848	X18_848	1	1	1	1	1	1	1	0	1	1	1	1	1	1	1	1	1		X18_848	16	0.115942	0.0134426
		1	814	X18_814	1	0	1	0	0	1	0	0	1	0	0	1	1	0	1	1	1			9	0.0652174	0.00425331
		1	757	X18_757	1	1	0	0	0	0	1	0	0	0	0	0	0	1	1	0	0			5	0.0362319	0.00131275
		1	705	X18_705	1	1	1	1	1	1	1	0	1	1	1	1	1	1	1	1	1		X18_705	16	0.115942	0.0134426
		1	666	X18_666	1	1	1	1	1	0	1	1	1	1	1	1	1	1	1	0	1			15	0.108696	0.0118147	14	14
		1	558	X18_558	0	0	0	1	0	0	0	0	0	1	0	1	0	1	1	0	0			5	0.0362319	0.00131275
		1	495	X18_495	1	0	0	0	0	0	0	0	1	0	0	1	0	0	0	0	0			3	0.0217391	0.00047259
		1	444	X18_444	1	0	1	1	1	1	0	0	1	1	1	1	1	0	0	0	1			11	0.0797101	0.00635371
		1	360	X18_360	0	0	0	0	0	0	0	0	0	1	0	0	1	1	0	0	0			3	0.0217391	0.00047259
		1	350	X18_350	1	1	1	1	1	1	1	1	1	1	1	1	1	1	1	0	1			16	0.115942	0.0134426
		1	346	X18_346	0	0	0	0	0	0	0	0	0	0	0	0	0	0	0	1	1			2	0.0144928	0.00021004
		1	198	X18_198	1	1	0	0	0	0	0	1	0	0	1	0	0	1	1	0	0			6	0.0434783	0.00189036
																								138	1
Primer OPM_06	16	1	912	M06_912	1	1	1	1	1	1	1	1	1	1	1	0	1	1	1	1	1		M06_912	16	0.0903955	0.00817134
		1	842	M06_842	1	0	0	0	0	1	0	0	1	0	0	0	0	0	0	0	0			3	0.0169492	0.000287274
		1	635	M06_635	1	1	1	1	1	1	1	1	1	1	1	1	1	1	1	1	1	1		18	0.101695	0.0103419
		1	496	M06_496	0	0	0	1	1	0	0	1	0	1	1	0	1	0	1	1	0			8	0.0451977	0.00204284
		1	489	M06_489	0	1	0	0	1	1	0	1	0	0	0	1	0	0	0	1	0			6	0.0338983	0.0011491
		1	477	M06_477	1	1	1	0	0	0	0	1	0	1	1	1	0	0	0	1	0			8	0.0451977	0.00204284
		1	427	M06_427	1	1	1	1	1	1	1	1	1	1	1	1	1	1	1	1	1	1		18	0.101695	0.0103419	16	12
		1	409	M06_409	0	1	0	0	0	1	1	1	1	1	1	1	0	1	0	1	1			11	0.0621469	0.00386224
		1	381	M06_381	0	0	0	0	0	0	1	0	0	0	0	0	0	0	0	0	0		M06_381	1	0.00564972	3.19193e-05
		1	379	M06_379	1	1	1	1	1	1	0	1	0	1	1	1	0	1	1	1	1			14	0.079096	0.00625618
		1	350	M06_350	1	1	1	1	1	1	1	1	1	1	1	1	1	1	1	1	1	1		18	0.101695	0.0103419
		1	339	M06_339	1	1	1	1	1	1	1	1	1	1	1	1	1	1	1	1	1	1		18	0.101695	0.0103419
		1	324	M06_324	0	0	0	0	0	0	1	0	0	0	0	0	0	1	1	0	0			3	0.0169492	0.000287274
		1	312	M06_312	1	1	1	1	1	1	1	0	0	1	1	1	1	1	1	1	1			15	0.0847458	0.00718184
		1	282	M06_282	1	1	0	1	1	0	1	1	0	1	1	1	1	1	1	1	1			14	0.079096	0.00625618
		1	222	M06_222	1	0	1	0	0	0	0	0	0	1	1	1	0	0	0	1	0			6	0.0338983	0.0011491
																								177	1
Primer OPM_12	13	1	493	m12_493	0	0	0	0	0	0	1	0	1	0	1	0	0	0	0	0	1			4	0.027027	0.00073046
		1	407	m12_407	0	0	1	0	1	0	1	1	1	1	1	0	0	1	0	1	1			10	0.0675676	0.00456538
		1	387	m12_387	1	1	1	1	1	1	1	1	1	1	1	1	1	1	1	1	1	1		18	0.121622	0.0147918
		1	355	m12_355	0	1	1	1	0	1	0	0	0	1	1	0	1	0	1	0	1			9	0.0608108	0.00369795
		1	319	m12_319	1	1	1	1	1	1	1	1	1	1	1	1	1	1	1	1	1	1		18	0.121622	0.0147918
		1	290	m12_290	1	0	0	1	1	1	1	1	1	1	0	0	1	0	0	1	1			11	0.0743243	0.00552411	13	9
		1	265	m12_265	1	1	1	1	1	1	1	1	1	1	1	1	1	1	1	1	1	1		18	0.121622	0.0147918
		1	258	m12_258	1	1	1	1	1	1	1	1	1	1	1	1	1	1	1	1	1	1		18	0.121622	0.0147918
		1	244	m12_244	1	1	1	1	0	0	0	1	0	1	0	1	1	1	1	0	0			10	0.0675676	0.00456538
		1	239	m12_239	1	0	0	0	0	0	0	0	0	0	0	1	1	0	0	1	0			4	0.027027	0.00073046
		1	212	m12_212	0	0	0	0	1	0	0	1	0	0	1	0	0	1	1	1	1			7	0.0472973	0.00223703
		1	139	m12_139	0	0	0	1	0	0	0	1	0	0	0	0	1	1	1	1	0			6	0.0405405	0.00164354
		1	135	m12_135	1	1	1	1	1	1	1	1	1	1	1	1	1	0	0	1	1			15	0.101351	0.0102721
																								148	1
Primer OPD_13	18	1	1049	D13_1049	1	1	1	1	1	1	1	1	1	1	1	1	1	1	1	1	1	1		18	0.0792952	0.00628772
		1	865	D13_865	0	1	0	0	0	0	1	0	1	1	1	1	1	1	1	1	0			10	0.0440529	0.00194065
		1	766	D13_766	1	1	1	1	1	1	1	1	1	1	1	1	1	1	1	1	1	1		18	0.0792952	0.00628772
		1	741	D13_741	0	1	0	0	0	0	1	0	0	0	1	0	0	1	1	1	1			7	0.030837	0.000950921
		1	492	D13_492	1	1	1	1	1	1	1	1	1	1	1	1	1	1	1	1	1	1		18	0.0792952	0.00628772
		1	444	D13_444	1	1	1	1	1	1	1	1	1	1	1	1	1	1	1	1	1	1		18	0.0792952	0.00628772
		1	440	D13_440	1	1	1	1	0	1	1	1	1	1	1	1	1	1	1	1	1		D13_440	16	0.0704846	0.00496808	18	12
		1	430	D13_430	0	0	1	1	0	0	0	0	1	0	0	0	0	0	0	0	0			3	0.0132159	0.000174659
		1	400	D13_400	1	1	1	1	1	1	1	1	1	1	1	1	1	0	1	1	1		D13_400	16	0.0704846	0.00496808
		1	349	D13_349	1	1	1	1	1	1	1	1	1	1	1	1	1	1	1	1	1	1		18	0.0792952	0.00628772
		1	338	D13_338	0	0	1	0	0	1	1	0	0	0	0	0	0	0	0	1	1			5	0.0220264	0.000485164
		1	332	D13_332	0	1	0	0	0	1	0	0	0	0	0	0	1	0	1	1	0			5	0.0220264	0.000485164
		1	319	D13_319	1	1	1	1	1	0	0	1	1	1	1	1	0	1	1	0	0			12	0.0528634	0.00279454
		1	317	D13_317	0	0	1	0	0	0	0	0	0	0	0	0	0	0	1	0	0			2	0.00881057	7.76262e-05
		1	299	D13_299	0	1	1	1	1	1	1	1	0	1	1	0	1	0	1	1	1			13	0.0572687	0.00327971
		1	282	D13_282	1	1	1	1	1	1	1	1	1	1	0	1	1	1	1	1	0			15	0.0660793	0.00436647
		1	217	D13_217	1	1	1	1	1	1	1	1	1	1	1	1	1	1	1	1	1	1		18	0.0792952	0.00628772
		1	213	D13_213	1	1	1	1	0	1	0	1	1	1	1	1	1	1	1	1	1			15	0.0660793	0.00436647
																								227	1
Primer OPM_15	14	1	1366	m15_1366	0	0	1	1	1	0	1	0	0	0	0	1	1	0	0	0	1			7	0.0642202	0.00412423
		1	1059	m15_1059	0	0	0	1	1	0	0	1	0	1	0	0	1	0	0	0	1			6	0.0550459	0.00303005
		1	881	m15_881	0	0	1	0	0	0	0	0	1	0	1	0	0	0	0	0	1			4	0.0366972	0.00134669
		1	835	m15_835	0	0	1	0	0	0	0	0	0	0	0	0	0	0	1	0	0			2	0.0183486	0.000336672
		1	762	m15_762	0	1	1	1	0	0	1	0	0	0	0	1	0	1	0	1	1			8	0.0733945	0.00538675
		1	760	m15_760	1	1	0	0	1	1	0	0	1	1	1	1	1	1	0	1	0			11	0.100917	0.0101843
		1	633	m15_633	0	1	1	1	1	1	1	0	1	1	1	1	0	1	1	1	0			13	0.119266	0.0142244	14	14
		1	597	m15_597	1	0	0	0	1	0	1	1	0	1	1	1	0	1	0	0	0			8	0.0733945	0.00538675
		1	545	m15_545	1	1	1	1	0	1	1	1	1	0	1	0	1	1	1	1	1			14	0.12844	0.0164969
		1	500	m15_500	0	1	1	1	1	1	1	1	1	1	0	1	1	0	0	1	1			13	0.119266	0.0142244
		1	490	m15_490	1	1	1	1	0	0	0	0	0	0	0	0	0	0	0	0	0			4	0.0366972	0.00134669
		1	479	m15_479	1	1	1	1	1	1	1	1	0	1	0	0	1	1	1	0	0			12	0.110092	0.0121202
		1	399	m15_399	0	0	0	1	1	0	1	1	0	1	1	0	0	0	0	0	0			6	0.0550459	0.00303005
		1	285	m15_285	0	0	1	0	0	0	0	0	0	0	0	0	0	0	0	0	0		M15_285	1	0.00917431	8.4168e-05
																								109	1
Primer OPG_11	8	1	896	G11_896	0	1	1	1	1	0	0	0	1	1	0	1	1	1	1	1	1			12	0.136364	0.018595
		1	804	G11_804	0	0	0	0	0	0	0	0	1	0	0	0	0	0	1	0	0			2	0.0227273	0.000516529
		1	733	G11_733	0	1	1	1	0	1	0	1	1	0	1	1	1	1	1	1	1			13	0.147727	0.0218233
		1	674	G11_674	1	1	1	1	1	1	0	1	1	1	1	1	1	1	1	1	1		G11_674	16	0.181818	0.0330579	8	7
		1	499	G11_499	0	0	0	1	1	1	1	1	1	1	1	0	1	0	0	0	1			10	0.113636	0.0129132
		1	497	G11_497	1	1	1	1	1	1	0	1	1	1	1	1	1	1	1	1	1		G11_497	16	0.181818	0.0330579
		1	476	G11_476	0	0	0	0	1	0	0	0	0	0	0	0	0	0	0	0	0		G11_476	1	0.0113636	0.000129132
		1	327	G11_327	1	1	1	1	1	1	1	1	1	1	1	1	1	1	1	1	1	1		18	0.204545	0.0418388
																								88	1
Primer OPH_18	19	1	915	H18_915	0	0	0	0	0	0	0	0	0	0	0	0	0	1	0	1	0			2	0.0134228	0.000180172
		1	833	H18_833	0	0	0	0	0	0	1	0	0	0	0	0	0	1	0	1	0			3	0.0201342	0.000405387
		1	781	H18_781	1	0	0	0	0	0	0	0	0	0	0	0	0	0	0	0	0		H18_781	1	0.00671141	4.5043e-05
		1	754	H18_754	1	1	0	0	0	1	0	0	0	0	1	0	1	0	1	1	1			8	0.0536913	0.00288275
		1	706	H18_706	0	1	1	1	1	0	0	1	1	1	0	1	1	0	1	0	1			11	0.0738255	0.0054502
		1	639	H18_639	1	1	1	1	1	1	1	1	1	1	1	1	1	1	1	1	1	1		18	0.120805	0.0145939
		1	497	H18_497	0	0	1	0	0	1	1	0	1	0	0	0	1	0	1	0	1			7	0.0469799	0.00220711
		1	493	H18_493	0	0	1	0	1	0	0	0	0	0	0	0	0	1	0	1	0			4	0.0268456	0.000720688
		1	464	H18_464	1	1	1	1	0	1	1	1	1	1	1	1	1	1	1	1	0			15	0.100671	0.0101347
		1	436	H18_436	0	1	1	1	1	1	1	1	0	1	1	0	0	1	1	1	0			12	0.0805369	0.00648619	19	18
		1	416	H18_416	0	0	0	1	0	0	0	0	0	0	0	0	1	1	0	0	0			3	0.0201342	0.000405387
		1	404	H18_404	0	0	0	0	0	1	0	0	0	0	0	0	0	0	1	1	0			3	0.0201342	0.000405387
		1	388	H18_388	0	0	0	0	0	0	1	1	0	1	1	1	0	1	0	0	0			6	0.0402685	0.00162155
		1	359	H18_359	0	0	1	0	0	1	1	0	1	0	0	0	0	0	1	0	1			6	0.0402685	0.00162155
		1	332	H18_332	0	1	0	1	1	0	0	1	0	1	0	0	1	1	0	1	0			8	0.0536913	0.00288275
		1	316	H18_316	1	1	1	1	1	1	1	1	1	1	1	1	1	0	1	1	1		H18_316	16	0.107383	0.011531
		1	301	H18_301	1	1	0	1	1	1	0	1	0	0	0	1	1	1	1	1	0			11	0.0738255	0.0054502
		1	291	H18_291	0	0	1	1	1	1	1	1	1	1	1	0	1	1	0	0	1			12	0.0805369	0.00648619
		1	268	H18_268	0	0	0	0	1	1	0	1	0	0	0	0	0	0	0	0	0			3	0.0201342	0.000405387
																								149	1
Primer OPB_17	9	1	1172	B17_1172	1	1	1	1	1	1	1	1	1	1	1	1	1	1	1	1	1	1		18	0.2	0.04
		1	1108	B17_1108	1	1	1	1	1	1	1	1	1	1	1	1	1	1	1	1	1	1		18	0.2	0.04
		1	855	B17_855	0	0	0	0	0	1	1	1	0	0	0	1	0	0	0	1	0			5	0.0555556	0.00308642
		1	742	B17_742	0	0	0	1	0	0	1	1	0	1	0	0	1	0	0	0	0			5	0.0555556	0.00308642
		1	724	B17_724	0	0	0	0	0	0	1	0	1	1	0	0	1	0	0	0	0			4	0.0444444	0.00197531	9	6
		1	578	B17_578	1	1	1	1	1	1	1	1	1	1	1	1	1	1	1	1	1	1		18	0.2	0.04
		1	499	B17_499	1	0	0	1	0	0	1	1	0	1	0	0	1	0	1	1	0			8	0.0888889	0.00790123
		1	297	B17_297	1	1	1	1	1	1	1	1	1	1	1	0	0	1	1	0	0			13	0.144444	0.0208642
		1	252	B17_252	0	0	0	0	0	0	0	1	0	0	0	0	0	0	0	0	0		B17_252	1	0.0111111	0.000123457
																								90	1
Primer OPA_04	16	1	1826	A4_1826	0	0	0	0	0	0	1	0	0	0	0	0	0	0	0	0	0		A04_1826	1	0.00657895	0.00657895			#DIV/0!	#DIV/0!
		1	1166	A4_1166	0	1	0	0	0	1	0	0	0	0	1	1	1	1	1	1	1			9	0.0592105	0.00350589			#DIV/0!	#DIV/0!
		1	854	A4_854	0	0	1	1	1	1	1	1	1	0	1	0	1	0	1	0	1			11	0.0723684	0.00523719			#DIV/0!	#DIV/0!
		1	743	A4_743	1	1	1	1	1	1	1	1	1	1	1	1	1	1	1	0	1		A04_743	16	0.105263	0.0110803			#DIV/0!	#DIV/0!
		1	717	A4_717	1	1	0	1	0	0	1	1	1	1	0	1	1	0	0	0	1			10	0.0657895	0.00432825			#DIV/0!	#DIV/0!
		1	699	A4_699	1	1	1	1	1	1	1	1	1	1	1	1	1	1	1	1	1	1		18	0.118421	0.0140235			#DIV/0!	#DIV/0!
		1	614	A4_614	0	0	0	1	1	0	0	0	0	0	0	0	0	0	0	0	0			2	0.0131579	0.00017313			#DIV/0!	#DIV/0!
		1	575	A4_575	1	1	1	1	1	1	1	1	1	1	1	1	1	1	1	1	1	1		18	0.118421	0.0140235	16	12	#DIV/0!	#DIV/0!
		1	515	A4_515	1	1	0	1	1	0	0	0	0	1	1	1	1	0	1	1	1			11	0.0723684	0.00523719			#DIV/0!	#DIV/0!
		1	474	A4_474	0	1	0	0	0	1	0	0	1	0	1	0	0	0	1	1	0			6	0.0394737	0.00155817			#DIV/0!	#DIV/0!
		1	452	A4_452	1	1	1	1	0	1	0	1	0	0	1	0	1	0	0	0	0			8	0.0526316	0.00277008			#DIV/0!	#DIV/0!
		1	429	A4_429	0	0	0	1	0	0	0	0	0	0	0	0	1	1	0	0	0			3	0.0197368	0.000389543			#DIV/0!	#DIV/0!
		1	416	A4_416	0	0	0	0	0	0	1	0	0	0	0	0	0	0	0	0	0		A04416	1	0.00657895	4.32825e-05			#DIV/0!	#DIV/0!
		1	392	A4_392	0	0	0	0	0	0	0	0	0	0	0	0	1	0	0	1	0			2	0.0131579	0.00017313			#DIV/0!	#DIV/0!
		1	376	A4_376	1	1	1	1	1	1	1	1	1	1	1	1	1	1	1	1	1	1		18	0.118421	0.0140235			#DIV/0!	#DIV/0!
		1	307	A4_301	1	1	1	1	1	1	1	1	1	1	1	1	1	1	1	1	1	1		18	0.118421	0.0140235			#DIV/0!	#DIV/0!
																								152	1	0.0971693			#DIV/0!	#DIV/0!
Primer OPE_12	17	1	2048	E12_2048	1	1	1	1	1	1	1	1	1	1	1	1	1	1	1	1	1	1		18	0.116129	0.013486
		1	1549	E12_1549	1	1	1	1	1	1	1	1	1	1	1	1	1	1	1	1	1	1		18	0.116129	0.013486
		1	1404	E12_1404	0	0	1	0	0	0	0	0	0	0	0	0	0	0	0	0	0		E12_1404	1	0.00645161	4.16233e-05
		1	1666	E12_1666	1	1	1	0	1	0	1	0	1	1	1	1	1	0	1	0	1			12	0.0774194	0.00599376
		1	967	E12_967	1	0	0	1	0	1	0	0	0	0	0	0	1	0	0	0	0			4	0.0258065	0.000665973
		1	874	E12_874	1	1	1	0	0	0	1	0	0	0	0	0	0	1	0	0	1			6	0.0387097	0.00149844
		1	815	E12_815	1	1	1	1	1	1	1	1	1	1	1	1	1	1	0	1	1		E12_815	16	0.103226	0.0106556	17	14
		1	806	E12_806	1	0	0	1	1	0	0	0	0	0	1	0	0	1	0	0	1			6	0.0387097	0.00149844
		1	720	E12_720	1	1	1	1	1	1	1	1	1	1	1	1	1	1	1	0	1		E12_720	16	0.103226	0.0106556
		1	710	E12_710	0	0	1	0	1	1	1	0	1	0	1	0	1	1	1	0	1			10	0.0645161	0.00416233
		1	491	E12_491	1	1	0	0	1	0	0	0	1	1	1	0	0	0	0	0	0			6	0.0387097	0.00149844
		1	414	E12_414	1	1	0	0	0	1	1	0	1	1	0	0	0	0	0	0	0			6	0.0387097	0.00149844
		1	385	E12_385	0	0	1	0	0	0	0	0	0	0	0	0	0	1	1	0	0			3	0.0193548	0.00037461
		1	379	E12_379	1	1	1	1	1	1	1	1	1	1	1	1	1	1	1	1	1	1		18	0.116129	0.013486
		1	348	E12_348	0	0	0	0	0	1	1	0	0	0	0	0	1	1	0	1	0			5	0.0322581	0.00104058
		1	332	E12_332	0	1	0	0	1	0	0	1	0	1	1	0	0	1	1	1	1			9	0.0580645	0.00337149
		1	315	E12_315	0	0	0	0	0	0	0	0	0	0	0	0	0	0	0	1	0		E12_315	1	0.00645161	4.16233e-05
																								155	1
Primer OPA-01	10	1	2281	A01_2281	0	1	1	0	0	1	0	0	0	0	1	0	1	1	1	1	1			9	0.0681818	0.00464876
		1	1663	A01_1663	1	1	1	1	1	1	1	1	1	1	1	0	1	1	1	1	1		A01_1663	16	0.121212	0.0146924
		1	1185	A01_1185	0	1	0	0	1	1	1	1	0	1	1	1	1	1	1	1	1			13	0.0984848	0.00969927
		1	1068	A01_1068	1	1	1	1	1	0	1	1	1	1	0	1	0	1	0	0	1			12	0.0909091	0.00826446
		1	779	A01_779	1	1	1	1	1	1	1	1	1	1	1	1	1	0	1	1	1		A01_779	16	0.121212	0.0146924	10	8
		1	690	A01_690	1	1	1	1	1	1	1	1	1	1	1	1	1	1	1	1	1	1		18	0.136364	0.018595
		1	496	A01_496	1	1	1	1	1	1	1	1	1	1	1	1	1	1	1	1	1	1		18	0.136364	0.018595
		1	488	A01_488	0	0	0	0	1	0	0	0	0	0	0	0	0	0	0	0	0		A01_488	1	0.00757576	5.73921e-05
		1	428	A01_428	1	1	1	1	1	1	1	1	1	1	1	0	1	1	1	1	1		A01_428	16	0.121212	0.0146924
		1	395	A01_395	1	1	1	1	1	0	1	1	1	1	0	1	1	1	0	0	1			13	0.0984848	0.00969927
																								132	1
Primer OPX_08	17	1	1157	X08_1157	0	0	1	0	1	0	0	1	0	0	1	0	0	0	0	1	1			6	0.0319149	0.00101856
		1	1020	X08_1020	0	0	0	1	1	1	1	1	0	1	0	0	1	0	0	0	0			7	0.037234	0.00138637
		1	864	X08_864	0	0	0	0	0	0	0	0	1	0	1	0	0	0	0	0	0			2	0.0106383	0.000113173
		1	822	X08_822	1	1	1	1	1	1	1	1	1	1	1	1	1	1	1	1	1	1		18	0.0957447	0.00916704
		1	774	X08_774	1	0	0	1	1	1	1	0	1	0	1	1	1	1	0	0	0			10	0.0531915	0.00282933
		1	749	X08_749	1	1	0	1	0	1	1	1	0	1	1	1	1	1	1	1	1			14	0.0744681	0.0055455
		1	735	X08_735	1	1	1	1	1	1	1	1	1	1	1	1	1	1	1	1	1	1		18	0.0957447	0.00916704
		1	498	X08_498	0	0	1	0	0	1	1	1	1	0	0	0	0	0	1	0	0			6	0.0319149	0.00101856	17	12
		1	479	X08_479	1	1	1	1	1	1	1	1	1	1	1	1	1	1	1	1	1	1		18	0.0957447	0.00916704
		1	463	X08_463	0	1	0	1	1	1	1	1	1	0	0	0	1	0	1	1	0			10	0.0531915	0.00282933
		1	422	X08_422	1	0	1	1	1	1	1	0	1	1	1	1	0	1	0	0	1			12	0.0638298	0.00407424
		1	407	X08_407	1	1	1	0	1	1	0	0	1	0	0	0	0	1	1	0	1			9	0.0478723	0.00229176
		1	388	X08_388	1	0	1	1	1	1	0	0	1	1	1	1	0	1	1	1	1			13	0.0691489	0.00478158
		1	299	X08_299	1	0	0	1	0	0	0	1	0	1	0	0	1	0	0	0	0			5	0.0265957	0.000707334
		1	286	X08_286	1	1	1	1	1	1	1	1	1	1	1	1	1	1	1	1	1	1		18	0.0957447	0.00916704
		1	253	X08_253	0	0	1	0	0	0	0	0	0	0	0	1	0	1	1	0	0			4	0.0212766	0.000452694
		1	241	X08_241	1	1	1	1	1	1	1	1	1	1	1	1	1	1	1	1	1	1		18	0.0957447	0.00916704
																								188	1
Primer OPX_17	16	1	1050	X17_1050	1	1	0	0	1	1	1	1	1	1	0	0	1	1	1	0	1			12	0.08	0.0064
		1	939	X17_939	1	1	1	1	1	1	1	1	1	1	1	1	1	1	1	1	0		X17_939	16	0.106667	0.0113778
		1	862	X17_862	1	1	1	1	1	0	1	1	1	1	1	1	1	1	1	0	1			15	0.1	0.01
		1	759	X17_759	1	1	1	1	1	1	1	1	1	1	1	1	1	1	1	1	1	1		18	0.12	0.0144
		1	718	X17_718	0	0	0	0	0	0	0	1	0	1	0	0	0	0	0	1	0			3	0.02	0.0004
		1	681	X17_681	0	0	0	0	0	0	1	0	0	0	0	1	0	0	1	0	1			4	0.0266667	0.000711111
		1	495	X17_495	1	1	1	1	1	1	1	0	1	1	1	1	1	0	1	0	1			14	0.0933333	0.00871111
		1	492	X17_492	0	0	0	0	0	0	0	1	0	0	1	1	0	0	0	0	1			4	0.0266667	0.000711111	16	13
		1	466	X17_466	0	0	0	0	0	0	1	0	0	0	0	0	0	0	0	0	0		X17_466	1	0.00666667	4.44444e-05
		1	455	X17_455	0	0	0	0	0	0	0	0	1	0	0	0	0	1	1	0	0			3	0.02	0.0004
		1	413	X17_413	1	1	1	1	1	1	1	1	1	1	1	1	1	1	1	1	1	1		18	0.12	0.0144
		1	392	X17_392	0	0	1	0	0	1	0	0	0	0	0	0	0	1	0	0	1			4	0.0266667	0.000711111
		1	351	X17_351	0	1	1	0	0	0	1	1	0	0	0	0	0	0	0	0	1			5	0.0333333	0.00111111
		1	333	X17_333	0	0	1	0	0	0	0	0	0	0	0	0	1	0	0	0	0			2	0.0133333	0.000177778
		1	323	X17_323	1	1	1	1	1	1	1	1	1	1	1	1	1	1	1	1	1	1		18	0.12	0.0144
		1	275	X17_275	1	1	0	0	0	1	1	1	1	1	1	1	1	1	0	1	1			13	0.0866667	0.00751111
																								150	1
Primer OPX_02	6	1	1153	X02_1153	1	1	1	1	1	1	1	1	1	1	1	1	1	1	1	1	1	1		18	0.209302	0.0438075
		1	766	X02_766	0	1	1	1	0	0	1	0	1	1	0	1	1	0	1	1	1			11	0.127907	0.0163602
		1	465	X02_465	1	1	1	1	1	1	1	1	1	1	1	1	1	1	1	1	1	1		18	0.209302	0.0438075	6	2
		1	425	X02_425	0	1	0	1	0	0	0	0	0	0	0	0	1	0	0	0	0			3	0.0348837	0.00121687
		1	343	X02_343	1	1	1	1	1	1	1	1	1	1	1	1	1	1	1	1	1	1		18	0.209302	0.0438075
		1	282	X02_282	1	1	1	1	1	1	1	1	1	1	1	1	1	1	1	1	1	1		18	0.209302	0.0438075
																								86	1
Primer OPX_01	10	1	1580	X01_1580	0	0	0	0	1	0	0	0	0	0	0	0	0	0	0	0	1			2	0.0333333	0.00111111
		1	1768	X01_1768	1	1	1	1	1	1	1	1	1	1	1	1	1	1	0	1	1		X01_1768	16	0.266667	0.0711111
		1	1742	X01_1742	0	1	0	0	0	1	0	0	0	0	1	0	0	0	1	1	1			6	0.1	0.01
		1	1217	X01_1217	0	0	1	1	1	0	0	0	1	1	1	0	1	1	1	0	1			10	0.166667	0.0277778
		1	853	X01_853	1	0	0	0	1	0	0	1	0	1	0	0	0	0	0	0	0			4	0.0666667	0.00444444	10	10
		1	774	X01_774	0	0	0	0	0	0	0	0	0	0	0	0	0	1	0	0	0		X01_774	1	0.0166667	0.000277778
		1	735	X01_735	0	0	1	1	1	0	0	0	0	0	0	0	0	0	0	0	1			4	0.0666667	0.00444444
		1	707	X01_707	0	0	0	0	0	0	1	0	0	0	0	0	0	0	0	0	0		X01_707	1	0.0166667	0.000277778
		1	474	X01_474	0	0	0	0	0	0	0	0	0	0	0	0	0	0	0	0	1		X01_474	1	0.0166667	0.000277778
		1	460	X01_460	1	1	1	1	1	1	1	1	1	1	1	1	1	1	0	0	1			15	0.25	0.0625
																								60	1
Primer OPA_18	26	1	2530	A18_2530	1	1	1	1	1	1	1	1	1	1	1	1	1	1	1	1	1	1		18	0.0978261	0.00956994
		1	2119	A18_2119	0	0	0	1	0	0	0	1	0	1	0	0	1	0	0	0	0			4	0.0217391	0.00047259
		1	967	A18_967	0	0	0	0	0	1	0	0	0	0	0	1	1	0	0	1	0			4	0.0217391	0.00047259
		1	846	A18_846	1	1	1	0	1	0	0	1	0	1	1	1	0	0	0	0	1			9	0.048913	0.00239249
		1	818	A18_818	1	1	0	0	0	0	0	1	0	0	1	1	1	1	1	0	0			8	0.0434783	0.00189036
		1	755	A18_755	0	1	0	0	0	0	0	1	1	1	0	1	1	1	1	1	1			10	0.0543478	0.00295369
		1	749	A18_749	0	0	0	0	0	0	0	0	0	0	0	1	0	0	0	0	0		A18_749	1	0.00543478	2.95369e-05
		1	732	A18_732	0	0	0	0	0	1	0	0	0	0	1	1	1	1	1	1	0			7	0.0380435	0.00144731
		1	713	A18_713	1	1	1	1	1	1	1	1	1	1	1	1	1	1	1	1	1	1		18	0.0978261	0.00956994
		1	693	A18_693	0	0	0	0	0	0	1	0	1	0	0	0	0	0	0	0	0			2	0.0108696	0.000118147
		1	629	A18_629	1	0	0	0	0	0	1	0	0	0	1	1	1	0	0	0	0			5	0.0271739	0.000738422
		1	492	A18_492	0	0	0	0	0	0	0	0	1	0	0	0	0	0	1	0	1			3	0.0163043	0.000265832
		1	490	A18_490	1	1	1	0	1	1	1	1	1	1	1	1	0	1	0	1	1			14	0.076087	0.00578922
		1	484	A18_484	0	0	0	0	0	0	1	0	0	0	0	0	0	0	0	0	0		A18_484	1	0.00543478	2.95369e-05
		1	473	A18_473	0	0	0	0	0	0	0	0	0	0	0	0	0	1	0	0	0		A18_473	1	0.00543478	2.95369e-05
		1	450	A18_450	0	0	0	1	1	1	0	1	0	1	1	1	1	1	1	0	0			10	0.0543478	0.00295369	26	22
		1	405	A18_405	1	1	1	0	0	1	1	0	1	0	0	0	0	0	1	0	1			8	0.0434783	0.00189036
		1	397	A18_397	0	0	0	1	0	1	0	1	0	0	0	0	0	0	0	0	0			3	0.0163043	0.000265832
		1	369	A18_369	0	0	0	0	0	0	0	0	0	0	0	0	0	0	1	0	0		A18_369	1	0.00543478	2.95369e-05
		1	358	A18_358	0	1	0	0	1	0	1	0	1	0	1	1	0	1	0	1	0			8	0.0434783	0.00189036
		1	340	A18_340	1	1	1	1	1	1	1	1	1	1	1	1	1	1	1	1	1	1		18	0.0978261	0.00956994
		1	267	A18_267	0	0	0	0	0	0	1	0	0	0	0	0	0	0	0	0	0		A18_267	1	0.00543478	2.95369e-05
		1	260	A18_260	1	0	1	0	0	0	0	0	1	0	0	0	0	0	0	0	0			3	0.0163043	0.000265832
		1	255	A18_255	0	1	1	0	0	1	1	0	0	1	1	1	0	1	0	0	0			8	0.0434783	0.00189036
		1	246	A18_246	1	1	1	1	1	1	1	1	1	1	1	1	1	1	1	1	1	1		18	0.0978261	0.00956994
		1	238	A18_238	0	0	0	0	0	0	0	0	0	0	1	0	0	0	0	0	0		A18_238	1	0.00543478	2.95369e-05
																								184	1
Primer OPA_07	14	1	1757	A07_1757	1	1	1	1	1	1	1	1	1	1	1	1	1	1	1	1	0			16	0.168421	0.0283657
		1	1720	A07_1720	0	0	0	0	0	0	0	0	1	0	1	0	0	1	0	1	0			4	0.0421053	0.00177285
		1	1650	A07_1650	1	1	1	1	1	1	1	1	0	1	0	0	1	0	1	0	1			12	0.126316	0.0159557
		1	843	A07_843	1	0	0	1	1	0	0	1	1	0	1	1	1	1	1	1	0			11	0.115789	0.0134072
		1	828	A07_828	1	0	0	1	1	1	0	1	1	0	1	0	1	0	0	1	0			9	0.0947368	0.00897507
		1	749	A07_749	0	0	0	0	1	0	1	0	0	0	0	0	0	0	0	0	0			2	0.0210526	0.000443213	14	14
		1	733	A07_733	0	0	0	1	0	0	0	0	1	0	1	0	0	0	0	0	0			3	0.0315789	0.00099723
		1	679	A07_679	1	1	1	1	1	0	1	1	1	0	1	1	1	1	1	1	1			15	0.157895	0.0249307
		1	605	A07_605	0	0	0	0	0	0	1	0	0	0	0	0	0	0	0	0	0		A07_605	1	0.0105263	0.000110803
		1	445	A07_445	1	0	0	0	0	0	1	0	0	0	0	0	1	1	1	0	0			5	0.0526316	0.00277008
		1	434	A07_434	0	0	0	0	0	0	0	0	0	0	0	0	0	0	0	0	1		A07_434	1	0.0105263	0.000110803
		1	341	A07_341	0	0	0	0	0	0	1	0	0	0	0	0	1	1	1	0	0			4	0.0421053	0.00177285
		1	311	A07_311	0	0	0	1	1	1	0	0	0	1	0	0	0	1	0	1	0			6	0.0631579	0.00398892
		1	269	A07_269	1	0	1	0	0	0	1	0	0	0	0	0	1	1	1	0	0			6	0.0631579	0.00398892
																								95	1
Primer OPA_11	17	1	1573	A11_1573	0	0	0	0	0	1	0	0	0	0	1	1	0	0	0	1	0			4	0.0350877	0.00123115
		1	1475	A11_1475	1	1	0	0	0	0	0	0	0	0	0	0	0	0	0	0	0			2	0.0175439	0.000307787
		1	1342	A11_1342	1	1	0	0	0	1	0	0	1	1	1	1	0	0	0	1	1			9	0.0789474	0.00623269
		1	1211	A11_1211	0	0	1	0	0	0	0	0	0	0	1	0	0	0	0	0	1			3	0.0263158	0.000692521
		1	1123	A11_1123	1	0	1	1	1	1	0	0	0	0	1	0	0	0	0	0	1			7	0.0614035	0.00377039
		1	921	A11_921	0	1	1	1	1	1	1	1	1	0	1	1	1	1	1	1	1			15	0.131579	0.017313
		1	761	A11_761	1	0	0	0	1	1	1	1	0	1	1	1	1	1	1	1	1			13	0.114035	0.013004
		1	709	A11_709	1	1	1	0	1	1	0	0	1	0	1	1	0	1	1	1	1			12	0.105263	0.0110803
		1	705	A11_705	0	0	0	1	0	0	1	1	0	1	0	0	1	0	0	0	1			6	0.0526316	0.00277008
		1	497	A11_497	0	0	0	0	0	0	0	0	0	0	0	0	1	0	0	0	0		A11_497	1	0.00877193	7.69468e-05	17	16
		1	492	A11_492	1	0	0	0	1	0	1	0	0	0	1	1	1	0	0	0	0			6	0.0526316	0.00277008
		1	478	A11_478	1	1	1	1	1	1	1	1	1	1	1	1	1	1	1	1	1	1		18	0.157895	0.0249307
		1	460	A11_460	1	0	1	0	1	0	0	1	0	1	0	0	1	0	0	0	1			7	0.0614035	0.00377039
		1	444	A11_444	0	0	1	1	1	0	0	0	0	0	0	0	0	0	0	0	1			4	0.0350877	0.00123115
		1	421	A11_421	1	0	0	0	0	0	0	0	1	0	0	0	0	0	0	0	0			2	0.0175439	0.000307787
		1	324	A11_324	0	0	0	0	0	0	1	0	0	0	0	0	0	0	0	0	0		A11_324	1	0.00877193	7.69468e-05
		1	268	A11_268	0	1	0	0	0	1	0	1	0	0	0	0	0	1	0	0	0			4	0.0350877	0.00123115
																								114	1	0.0907972
Primer OPW_11	20	1	1995	W11_1995	1	1	1	1	1	1	1	1	1	1	1	0	1	1	1	1	1		W11_1995	16	0.102564	0.0105194
		1	1806	W11_1806	0	0	0	0	1	0	0	0	0	0	1	1	1	1	1	1	1			8	0.0512821	0.00262985
		1	1381	W11_1381	1	0	1	1	1	0	1	1	1	0	0	0	1	0	0	1	0			9	0.0576923	0.0033284
		1	1221	W11_1221	0	0	1	0	0	0	1	0	1	0	0	0	1	0	0	0	0			4	0.025641	0.000657462
		1	867	W11_867	0	0	0	0	1	1	0	1	1	0	0	0	1	1	1	1	1			9	0.0576923	0.0033284
		1	861	W11_861	0	0	0	0	1	1	0	1	1	0	0	0	1	0	0	1	0			6	0.0384615	0.00147929
		1	785	W11_785	0	0	0	0	0	0	1	0	1	0	1	1	1	1	1	1	1			9	0.0576923	0.0033284
		1	741	W11_741	0	0	0	0	1	0	0	0	0	0	1	1	1	1	0	1	1			7	0.0448718	0.00201348
		1	721	W11_721	0	0	0	0	0	1	1	0	1	0	1	1	1	0	1	1	0			8	0.0512821	0.00262985
		1	631	W11_631	0	1	0	0	1	0	0	0	0	0	0	0	1	1	1	0	0			5	0.0320513	0.00102728
		1	530	W11_530	0	1	1	1	1	1	1	1	1	1	0	1	1	0	0	1	1			13	0.0833333	0.00694444	20	20
		1	499	W11_499	1	1	1	0	0	0	0	0	1	0	0	0	0	0	0	0	0			4	0.025641	0.000657462
		1	495	W11_495	0	0	0	1	1	0	1	1	1	1	0	0	1	1	1	0	1			10	0.0641026	0.00410914
		1	465	W11_465	1	0	1	1	0	1	1	1	1	1	1	0	0	0	0	0	0			9	0.0576923	0.0033284
		1	448	W11_448	1	1	1	1	1	0	1	1	1	1	0	1	1	1	1	0	0			13	0.0833333	0.00694444
		1	402	W11_402	0	0	0	1	1	0	1	1	1	0	0	0	0	1	1	1	1			9	0.0576923	0.0033284
		1	391	W11_391	1	1	1	0	0	0	0	0	0	0	0	0	0	0	1	0	0			4	0.025641	0.000657462
		1	365	W11_365	0	0	0	0	0	0	1	0	1	0	0	0	0	0	1	1	0			4	0.025641	0.000657462
		1	358	W11_358	0	1	0	0	0	0	0	0	0	0	0	0	0	0	0	0	0		W11_358	1	0.00641026	4.10914e-05
		1	218	W11_218	0	0	1	0	0	1	0	0	0	1	1	0	1	1	1	1	0			8	0.0512821	0.00262985
																								156	1	0.06024
Primer OPC_05	11	1	951	C05_951	1	1	1	1	1	1	1	1	1	1	1	1	1	1	1	1	1	1		18	0.185567	0.0344351
		1	816	C05_816	0	0	0	0	0	1	0	1	0	0	0	0	0	1	1	0	0			4	0.0412371	0.0017005
		1	805	C05_805	1	1	1	1	0	1	1	1	1	0	1	1	1	1	1	1	1			15	0.154639	0.0239133
		1	756	C05_756	1	1	1	1	1	1	1	1	1	0	1	1	1	0	1	1	1			15	0.154639	0.0239133	11	9
		1	745	C05_745	1	1	1	1	1	1	1	1	1	1	1	1	1	1	1	1	1	1		18	0.185567	0.0344351
		1	693	C05_693	0	0	0	0	0	1	0	0	0	0	0	0	0	1	0	0	0			2	0.0206186	0.000425125
		1	511	C05_511	0	0	0	0	0	1	0	0	0	0	0	0	0	0	0	0	0		C05_511	1	0.0103093	0.000106281
		1	449	C05_449	0	0	0	1	0	0	1	1	0	1	0	0	1	0	0	0	0			5	0.0515464	0.00265703
		1	381	C05_381	0	0	0	0	0	0	0	0	0	1	1	0	0	0	0	0	0			2	0.0206186	0.000425125
		1	359	C05_359	1	1	1	0	1	1	1	0	1	0	1	1	0	1	1	1	1			13	0.134021	0.0179615
		1	352	C05_352	0	0	0	1	0	0	0	1	0	1	0	0	1	0	0	0	0			4	0.0412371	0.0017005
																								97	1
Primer OPK_10	6	1	1973	K10_1973	1	0	0	0	0	1	0	0	0	0	0	1	1	0	1	0	0			5	0.113636	0.0129132				0
		1	879	K10_879	1	1	0	1	0	0	0	0	1	1	0	0	0	0	1	1	1			8	0.181818	0.0330579				0
		1	596	K10_596	1	1	1	1	0	1	1	1	1	1	1	1	1	1	1	0	1			15	0.340909	0.116219	6	6		0
		1	494	K10_494	0	1	1	1	0	0	1	1	1	0	1	0	1	1	0	1	0			10	0.227273	0.0516529				0
		1	492	K10_492	0	0	0	0	0	0	0	0	0	0	1	1	0	0	1	0	1			4	0.0909091	0.00826446				0
		1	393	K10_393	0	0	0	0	0	0	0	0	1	0	1	0	0	0	0	0	0			2	0.0454545	0.00206612				0
																								44	1	0.224174				0
	434	total
	14.4667	mean	434																			Monomor
	73	Mono.																				73					434	361	Total
	0.83	Polymor.																										0.831797	% polymorphism
