# Supplementary material for: Comparative Assessment of SSR and RAPD markers for genetic diversity in some Mango cultivars
Source: PeerJ. 2023 Sep 28;11:e15722. doi: 10.7717/peerj.15722 (PMC10542820; doi:10.7717/peerj.15722)
Supplement: Supplemental Information 4 [file peerj-11-15722-s004.xlsx]

## Sheet: Sheet_1
Polymorphic bands	Total number	primers name	Real alleles M. W. (bp)	Banarasi Langra	Mabrouka	Ewais	Taymour	Hindi Besennara	Mesk	Zebda	Hindi mlooky	Companeit Elsowwa	Sukkary white	Mistikawy	Fajri kalan	Elwazza neck	Keitt	Kent	Sennary	Nabiel
7	7	MIAC_3	176	0	0	0	0	0	0	1	0	0	0	0	0	0	0	0	0	0
		MIAC_3	182	0	1	1	1	0	1	0	0	0	0	0	0	0	0	0	0	0
		MIAC_3	183	0	0	0	0	0	0	1	0	0	0	0	0	0	0	0	0	0
		MIAC_3	185	0	0	1	0	0	0	0	0	0	0	0	0	0	0	0	0	0
		MIAC_3	186	0	0	0	0	0	0	0	0	0	0	0	0	0	0	0	1	0
		MIAC_3	188	1	0	0	0	0	0	0	1	1	1	0	1	1	1	1	0	0
		MIAC_3	193	0	0	0	0	1	0	0	1	1	0	1	0	0	0	1	0	1
6	6	mMiCiR_5	159	0	0	0	0	0	0	1	0	0	0	0	0	0	0	0	0	0
		mMiCiR_5	171	0	1	1	0	0	1	0	0	1	0	1	0	0	1	0	1	1
		mMiCiR_5	173	0	0	0	0	0	0	0	0	0	0	0	1	0	0	0	0	0
		mMiCiR_5	176	0	0	0	0	1	0	0	1	0	1	0	0	0	0	0	0	0
		mMiCiR_5	182	1	1	1	0	0	0	0	0	1	0	0	1	1	1	0	0	1
		mMiCiR_5	186	1	0	0	1	0	1	1	1	0	1	1	0	1	0	1	1	0
4	4	MiSHRS_18	94	1	0	1	0	1	0	1	1	0	1	0	0	0	0	0	0	1
		MiSHRS_18	100	1	1	1	1	0	0	0	0	1	0	0	1	1	1	1	1	0
		MiSHRS_18	103	0	0	0	0	0	1	1	1	1	1	1	0	0	1	1	1	1
		MiSHRS_18	105	0	0	0	0	0	0	0	0	0	0	0	1	0	0	0	0	0
7	7	LMMA_7	198	0	1	0	0	0	0	0	0	0	0	0	1	1	1	1	1	0
		LMMA_7	200	0	1	1	1	1	0	1	1	1	1	1	0	1	0	1	0	0
		LMMA_7	204	1	0	0	0	0	0	1	0	1	1	1	0	0	1	0	0	0
		LMMA_7	206	1	0	0	1	0	0	0	1	0	0	0	0	0	0	0	0	0
		LMMA_7	208	0	0	1	0	0	1	0	0	0	0	0	1	0	0	0	0	1
		LMMA_7	212	0	0	0	0	0	0	0	0	0	0	0	0	0	0	0	1	0
		LMMA_7	214	0	0	0	0	1	0	0	0	0	0	0	0	0	0	0	0	0
9	9	LMMA_1	96	0	0	1	0	0	0	0	0	0	0	0	0	0	0	0	1	1
		LMMA_1	196	0	0	0	0	0	0	0	0	0	0	0	0	1	0	0	0	0
		LMMA_1	197	1	1	0	0	0	1	0	0	0	0	0	1	0	0	0	0	0
		LMMA_1	199	0	0	0	1	1	0	1	1	0	1	0	0	1	1	0	0	1
		LMMA_1	202	0	0	1	0	0	0	1	0	0	1	1	0	0	1	0	1	0
		LMMA_1	204	1	1	0	0	0	1	0	0	1	0	0	0	0	0	1	0	0
		LMMA_1	206	0	0	0	0	0	0	0	0	0	0	1	0	0	0	0	0	0
		LMMA_1	208	0	0	0	0	0	0	0	0	1	0	0	0	0	0	0	0	0
		LMMA_1	212	0	0	0	0	0	0	0	0	0	0	0	1	0	0	0	0	0
6	6	LMMA_15	207	1	1	1	0	0	0	0	0	1	1	0	1	1	0	0	0	0
		LMMA_15	209	0	0	0	1	1	0	1	1	0	0	1	0	0	1	0	1	1
		LMMA_15	213	1	0	0	0	0	1	0	0	0	0	0	0	0	0	0	0	0
		LMMA_15	217	0	1	1	1	1	0	0	1	1	1	1	1	1	1	1	1	0
		LMMA_15	219	0	0	0	0	0	0	0	0	0	0	0	0	0	0	0	0	1
		LMMA_15	221	0	0	0	0	0	0	0	0	0	0	0	0	0	0	1	0	0
8	8	LMMA_8	255	1	1	1	1	0	0	1	0	1	1	0	1	1	1	0	0	0
		LMMA_8	259	0	1	1	1	1	1	0	1	0	1	1	0	0	0	1	1	1
		LMMA_8	261	1	0	0	0	1	0	0	0	0	0	0	1	0	0	0	0	0
		LMMA_8	265	0	0	0	0	0	0	1	0	0	0	0	0	0	0	0	0	0
		LMMA_8	266	0	0	0	0	0	0	0	0	1	0	0	0	0	0	0	0	0
		LMMA_8	267	0	0	0	0	0	0	0	1	0	0	0	0	0	0	1	1	0
		LMMA_8	269	0	0	0	0	0	1	0	0	0	0	0	0	1	1	0	0	0
		LMMA_8	271	0	0	0	0	0	0	0	0	0	0	1	0	0	0	0	0	0
5	5	LMMA_9	171	0	0	0	0	0	0	0	0	0	0	1	0	0	1	0	0	1
		LMMA_9	178	1	0	0	0	1	0	0	0	0	0	0	1	0	0	0	0	0
		LMMA_9	179	0	1	0	1	0	1	0	1	1	0	1	0	1	0	1	1	0
		LMMA_9	183	0	0	1	1	0	0	1	0	0	0	0	0	0	0	0	0	0
		LMMA_9	185	0	1	0	0	0	1	0	0	1	1	0	1	0	0	0	1	1
6	6	LMMA_11	232	1	0	0	0	0	0	0	0	0	0	0	0	0	1	1	0	0
		LMMA_11	239	0	0	1	0	1	1	1	0	0	0	0	1	0	0	0	1	1
		LMMA_11	243	0	1	1	0	0	1	0	0	1	0	0	1	1	0	1	0	0
		LMMA_11	244	1	0	0	0	1	0	0	1	0	0	0	0	0	0	0	0	0
		LMMA_11	247	0	0	0	1	0	0	0	0	0	1	0	0	1	0	0	0	0
		LMMA_11	249	0	1	0	0	0	0	0	1	0	1	1	0	0	1	0	1	1
5	5	LMMA_13	179	0	0	1	0	0	0	0	0	1	0	1	0	0	0	0	0	1
		LMMA_13	188	1	1	1	1	0	0	0	0	0	0	0	1	1	0	0	0	0
		LMMA_13	190	0	0	0	1	1	0	0	1	1	1	0	0	1	1	1	1	0
		LMMA_13	194	0	0	0	0	0	0	1	0	0	0	0	0	0	0	0	0	0
		LMMA_13	198	1	0	0	0	0	1	1	0	0	0	1	0	0	1	0	0	1
8	8	mMiCIR_8	150	0	0	0	1	0	1	1	0	0	0	1	0	0	0	0	0	0
		mMiCIR_8	155	1	0	1	0	0	0	0	0	0	0	0	0	0	0	0	0	0
		mMiCIR_8	156	0	0	0	0	0	0	1	0	0	0	0	0	0	0	0	0	0
		mMiCIR_8	159	0	0	0	0	1	1	0	0	1	0	1	1	0	1	1	0	1
		mMiCIR_8	162	0	1	0	0	0	0	0	0	0	0	0	0	1	1	1	1	0
		mMiCIR_8	164	0	0	0	1	1	0	0	1	0	0	0	1	1	0	0	0	0
		mMiCIR_8	166	1	1	0	0	0	0	0	1	0	1	0	0	0	0	0	1	1
		mMiCIR_8	169	0	0	1	0	0	0	0	0	1	0	0	0	0	0	0	0	0
5	5	MiSHRS_4	118	0	0	0	0	0	1	0	0	0	0	1	0	0	0	0	0	1
		MiSHRS_4	122	1	0	0	1	0	0	0	0	1	1	1	1	0	1	0	0	0
		MiSHRS_4	124	0	1	1	1	1	1	1	1	1	1	0	1	1	0	0	1	1
		MiSHRS_4	125	0	0	0	0	1	0	1	1	0	0	0	0	0	0	1	0	0
		MiSHRS_4	127	1	0	0	0	0	0	0	0	0	0	0	0	0	1	1	0	0
5	5	MiSHRS_1	190	1	0	1	0	0	0	0	0	0	0	0	1	0	0	1	1	1
		MiSHRS_1	197	0	1	0	0	0	1	0	0	0	0	0	0	0	0	0	0	0
		MiSHRS_1	201	0	0	0	1	1	0	1	1	0	1	0	0	1	1	0	0	0
		MiSHRS_1	205	0	0	0	0	0	0	0	0	1	0	1	1	0	0	0	0	0
		MiSHRS_1	207	0	1	0	1	1	0	0	0	0	1	0	0	1	1	0	0	0
4	4	MIAC_4	93	1	0	0	0	0	1	1	0	0	0	0	1	0	1	0	1	0
		MIAC_4	95	0	1	0	1	1	0	0	1	0	1	0	0	1	0	0	0	0
		MIAC_4	100	0	1	1	0	0	0	1	0	1	0	1	1	0	1	1	0	1
		MIAC_4	112	0	0	0	1	0	1	0	0	0	1	0	0	1	0	0	1	0
10	10	MIAC_5	112	0	0	0	0	0	1	0	0	0	0	0	0	0	0	0	0	0
		MIAC_5	117	0	0	0	1	0	0	0	1	0	1	0	0	1	1	0	1	0
		MIAC_5	119	0	0	1	0	0	0	0	0	0	0	0	0	0	0	0	0	0
		MIAC_5	121	0	0	0	0	1	0	0	0	0	0	0	0	0	0	0	0	0
		MIAC_5	123	0	0	0	0	0	0	1	0	1	0	0	1	0	0	1	0	0
		MIAC_5	124	0	1	1	0	0	0	0	0	0	1	1	0	0	0	0	0	1
		MIAC_5	128	1	0	0	0	0	0	0	0	0	0	0	0	0	0	0	0	0
		MIAC_5	132	0	0	0	1	0	0	1	0	1	0	0	0	0	0	0	0	0
		MIAC_5	144	0	0	0	0	0	0	0	0	0	0	1	0	0	0	0	0	1
		MIAC_5	152	1	0	0	0	1	1	0	0	0	0	0	0	1	0	0	0	0
6	6	mMiCiR_9	149	0	0	0	0	0	0	0	0	0	0	0	0	0	0	0	0	1
		mMiCiR_9	151	0	0	1	0	1	0	1	0	1	1	1	1	0	1	0	1	0
		mMiCiR_9	156	0	1	0	1	0	1	0	0	0	0	0	0	1	0	0	0	0
		mMiCiR_9	158	0	0	0	0	0	0	1	0	1	0	1	0	0	0	1	0	0
		mMiCiR_9	160	1	0	1	0	1	0	0	1	0	0	0	1	0	0	0	0	1
		mMiCiR_9	163	1	0	0	0	0	0	0	1	0	1	0	0	1	1	1	1	0
7	7	mMiCiR_22	141	0	0	1	0	0	0	0	0	0	0	0	0	1	1	0	1	1
		mMiCiR_22	149	1	1	1	0	0	0	1	0	0	0	0	0	0	1	1	1	0
		mMiCiR_22	154	0	0	0	0	0	1	0	1	0	1	0	0	0	0	0	0	0
		mMiCiR_22	156	0	0	0	1	0	0	0	0	1	0	0	0	1	0	0	0	0
		mMiCiR_22	158	0	0	0	0	1	0	0	1	0	0	0	0	0	0	0	0	0
		mMiCiR_22	160	0	0	0	1	1	1	0	0	1	1	1	1	0	0	0	0	0
		mMiCiR_22	167	0	1	0	0	0	0	0	0	0	0	0	0	0	0	0	0	0
5	5	MIAC_2	133	0	0	0	0	1	0	1	0	0	0	1	0	1	0	0	1	1
		MIAC_2	139	0	1	0	1	0	0	1	0	1	1	0	0	0	0	0	0	0
		MIAC_2	152	0	0	0	0	0	0	0	0	0	0	0	0	0	0	1	0	0
		MIAC_2	163	1	0	1	1	0	1	0	1	0	1	0	0	1	1	1	0	1
		MIAC_2	172	0	0	0	0	0	0	0	0	0	0	0	1	0	0	0	0	0
7	7	LMMA_14	153	0	0	1	1	0	0	0	0	0	0	0	0	0	0	0	0	0
		LMMA_14	155	0	1	0	0	0	0	0	0	0	0	0	0	1	0	0	0	0
		LMMA_14	159	0	0	0	0	0	0	0	0	0	1	1	1	0	1	0	1	0
		LMMA_14	161	1	0	1	1	1	1	1	1	1	0	0	0	0	0	0	0	1
		LMMA_14	164	0	1	0	0	0	0	0	0	0	0	0	0	1	0	0	0	0
		LMMA_14	169	0	0	0	0	0	0	1	0	0	1	1	1	0	1	1	1	1
		LMMA_14	174	0	0	0	0	0	1	0	0	0	0	0	0	0	0	1	0	0
8	8	LMMA_10	147	0	0	0	0	0	1	0	0	0	0	0	0	0	0	0	0	0
		LMMA_10	149	0	0	0	1	1	0	0	0	0	1	0	0	0	0	0	1	1
		LMMA_10	153	1	1	1	1	0	0	1	1	1	1	1	0	1	0	1	0	1
		LMMA_10	155	0	0	0	0	0	0	0	0	1	0	0	0	0	0	0	0	0
		LMMA_10	170	1	1	0	0	0	1	1	0	0	0	0	1	0	1	1	1	0
		LMMA_10	174	0	0	0	0	1	0	0	1	0	0	0	0	0	1	0	0	0
		LMMA_10	178	0	0	1	0	0	0	0	0	0	0	0	0	1	0	0	0	0
		LMMA_10	180	0	0	0	0	0	0	0	0	0	0	1	1	0	0	0	0	0
9	9	mMiCiR_18	202	0	0	0	0	0	0	0	0	0	0	0	1	0	0	0	0	0
		mMiCiR_18	205	0	0	0	0	1	0	0	1	0	0	0	0	0	0	0	0	0
		mMiCiR_18	211	0	0	0	0	0	0	1	0	0	0	0	0	0	0	0	0	0
		mMiCiR_18	214	0	0	0	0	0	1	0	0	0	0	0	0	0	0	1	0	0
		mMiCiR_18	216	0	1	0	0	0	0	0	0	0	0	0	0	0	0	0	0	0
		mMiCiR_18	222	0	0	0	0	1	0	0	0	0	1	0	0	0	1	1	0	0
		mMiCiR_18	228	0	0	0	1	0	0	0	1	0	0	1	0	0	1	0	0	0
		mMiCiR_18	229	0	0	1	0	0	1	0	0	1	0	0	1	1	0	0	1	1
		mMiCiR_18	232	1	1	0	0	0	0	1	0	0	0	0	0	0	0	0	0	0
5	5	mMiCIR_25	208	0	0	0	1	0	0	1	0	0	0	0	0	0	1	1	0	0
		mMiCIR_25	212	0	0	0	0	0	0	0	0	0	1	0	0	0	0	0	0	1
		mMiCIR_25	214	0	1	1	0	1	1	1	1	1	0	1	1	0	0	1	0	0
		mMiCIR_25	232	1	0	0	0	0	0	0	0	0	0	0	0	0	0	0	0	0
		mMiCIR_25	238	0	0	0	0	0	0	0	0	0	0	0	0	1	1	0	1	0
5	5	MiSHRS_48	201	0	0	1	0	0	0	0	0	0	0	0	0	0	0	0	0	1
		MiSHRS_48	206	0	0	1	0	0	0	0	0	0	0	0	0	0	0	0	0	1
		MiSHRS_48	218	0	1	0	0	0	1	1	0	1	0	1	1	0	0	0	0	0
		MiSHRS_48	221	1	0	0	1	1	0	0	1	0	1	0	0	1	1	0	0	0
		MiSHRS_48	226	0	0	0	0	0	0	0	0	0	0	0	0	0	1	1	1	0
9	9	MIAC_6	270	0	0	0	0	0	0	0	0	0	0	0	0	0	0	0	0	1
		MIAC_6	277	0	0	0	0	0	0	1	0	0	0	0	0	0	0	0	0	0
		MIAC_6	294	0	0	0	1	1	0	0	1	0	1	0	1	1	0	0	0	0
		MIAC_6	296	0	0	0	0	0	0	0	0	0	0	1	0	0	1	0	0	0
		MIAC_6	300	0	0	0	1	1	0	0	0	1	0	0	0	1	0	0	0	0
		MIAC_6	305	1	0	0	0	0	0	0	0	0	0	0	0	0	0	0	0	0
		MIAC_6	307	1	1	1	0	0	1	0	0	0	0	0	0	0	0	0	1	0
		MIAC_6	308	0	0	0	0	0	0	1	1	1	1	1	1	0	1	1	0	0
		MIAC_6	327	0	0	1	0	0	0	0	0	0	0	0	0	0	0	0	0	1
9	9	mMiCIR_29	161	0	0	0	0	0	0	0	0	0	0	1	0	0	0	0	0	0
		mMiCIR_29	167	0	1	0	0	0	0	0	0	0	0	0	1	0	0	0	0	0
		mMiCIR_29	173	0	0	1	0	0	0	0	0	1	0	0	0	0	0	1	0	0
		mMiCIR_29	175	0	1	0	0	0	1	0	0	0	0	1	0	1	0	0	1	0
		mMiCIR_29	177	1	0	1	0	1	0	1	1	0	1	0	0	0	1	0	1	1
		mMiCIR_29	179	0	0	0	0	0	0	0	0	0	0	0	0	0	0	1	0	0
		mMiCIR_29	180	0	0	0	0	0	0	0	1	0	0	0	0	0	0	0	0	0
		mMiCIR_29	189	0	0	0	1	1	0	0	0	0	1	0	1	1	0	0	0	0
		mMiCIR_29	195	1	0	0	0	0	1	0	0	1	0	0	0	0	0	0	0	0
6	6	mMiCIR_30	177	1	0	1	0	1	0	0	1	0	0	0	0	0	0	0	0	1
		mMiCIR_30	186	0	0	0	0	0	0	1	1	1	0	1	0	0	1	1	0	0
		mMiCIR_30	190	0	0	0	0	0	0	0	0	0	0	0	0	1	0	0	0	0
		mMiCIR_30	191	0	1	0	1	0	0	0	0	1	0	0	0	0	0	0	0	0
		mMiCIR_30	193	0	0	0	1	1	0	0	0	0	1	0	1	1	0	0	0	0
		mMiCIR_30	195	1	0	1	0	0	1	1	0	0	1	0	1	0	1	1	1	1
4	4	mMiCIR_36	249	0	0	0	0	1	1	0	1	0	0	0	0	1	0	0	1	1
		mMiCIR_36	256	0	0	0	0	0	0	1	0	1	0	1	0	0	0	1	1	0
		mMiCIR_36	260	0	0	0	0	0	0	1	0	0	0	0	0	0	0	0	0	0
		mMiCIR_36	263	1	1	1	1	1	1	0	0	1	1	1	1	1	1	1	0	1
7	7	MiSHRS_32	201	1	0	0	0	1	0	0	1	0	1	1	1	0	0	0	0	0
		MiSHRS_32	205	0	0	1	1	1	1	1	1	1	0	1	0	1	1	1	0	1
		MiSHRS_32	206	0	0	0	0	0	0	0	0	0	1	0	0	0	0	0	1	0
		MiSHRS_32	214	0	1	0	0	0	0	0	0	0	0	0	0	1	0	0	1	0
		MiSHRS_32	216	0	0	0	0	0	0	1	0	0	0	0	0	0	0	0	0	0
		MiSHRS_32	220	1	0	0	0	0	0	0	0	0	0	0	0	0	0	0	0	0
		MiSHRS_32	221	0	0	1	1	0	0	0	0	0	0	0	0	0	1	0	0	1
5	5	mMiCIR_21	160	0	0	0	0	0	0	0	1	0	1	0	0	0	0	0	0	0
		mMiCIR_21	165	1	1	1	0	0	0	0	0	1	0	1	1	1	1	0	1	1
		mMiCIR_21	176	0	0	0	0	0	0	0	0	0	0	0	0	0	0	1	0	0
		mMiCIR_21	181	0	0	0	0	0	0	1	0	0	0	0	0	0	0	0	0	0
		mMiCIR_21	187	0	0	0	0	1	0	0	0	0	0	0	0	0	0	0	0	0
5	5	MiSHRS_29	175	0	0	1	1	0	0	1	0	0	1	1	0	0	0	0	0	1
		MiSHRS_29	179	1	1	1	0	1	1	1	1	1	1	1	1	1	1	1	1	1
		MiSHRS_29	181	0	0	0	0	0	0	0	0	0	0	0	0	0	1	0	0	0
		MiSHRS_29	183	0	0	0	1	0	0	0	1	0	0	0	0	1	0	0	0	0
		MiSHRS_29	185	1	0	0	0	0	0	0	0	0	0	0	0	0	0	0	0	0
																																	Total	Mean
		total alleles	7	6	4	7	9	6	8	5	6	5	8	5	5	4	10	6	7	5	7	8	9	5	5	9	9	6	4	7	5	5	192	6.4
									ranged from 4 to 10
						polymorphism= 100 %
